# Supplementary material
Source: PubMed Central journal article supplement (PMC6392177)
Supplement: NIHMS80442-supplement-Supplement.pdf [file NIHMS80442-supplement-Supplement.pdf]

## SUPPLEMENTARY DATA

### **Assessment of electrophile damage in a human brain endothelial cell line utilizing a clickable alkyne analogue of 2-chlorohexadecanal**

Christoph Nussold<sup>1,2</sup>, Andreas Üllen<sup>1</sup>, Nora Kogelnik<sup>1</sup>, Eva Bernhart<sup>1</sup>, Helga Reicher<sup>1</sup>, Ioanna Plastira<sup>1</sup>, Toma Glasnov<sup>3</sup>, Klaus Zangger<sup>4</sup>, Gerald Rechberger<sup>2,5,6</sup>, Manfred Kollroser<sup>7</sup>, Günter Fauler<sup>8</sup>, Heimo Wolinski<sup>2,5</sup>, Babette B. Weksler<sup>9</sup>, Ignacio A. Romero<sup>10</sup>, Sepp D. Kohlwein<sup>2,5</sup>, Pierre-Olivier Couraud<sup>11</sup>, Ernst Malle<sup>1</sup>, and Wolfgang Sattler<sup>1,2</sup>

<sup>1</sup> Institute of Molecular Biology and Biochemistry, Medical University of Graz, Austria

<sup>2</sup> BioTechMed Graz, Austria

<sup>3</sup> Christian Doppler Laboratory for Flow Chemistry, Institute of Chemistry, University of Graz, Austria

<sup>4</sup> Institute of Chemistry, University of Graz, Austria

<sup>5</sup> Institute of Molecular Biosciences, NAWI-Graz, University of Graz, Austria

<sup>6</sup> OMICS-Center Graz, BioTechMed Graz, Austria

<sup>7</sup> Institute of Forensic Medicine, Medical University of Graz, Austria

<sup>8</sup> Clinical Institute of Medical and Chemical Laboratory Diagnostics, Medical University of Graz, Austria

<sup>9</sup> Weill Medical College of Cornell University, New York, NY 10065, USA

<sup>10</sup> Department of Biological Sciences, The Open University, Walton Hall, Milton Keynes MK7 6BJ, UK

<sup>11</sup> Institut Cochin, Inserm, U1016, CNRS UMR 8104, Paris Descartes University, Sorbonne Paris Cité, Paris, France

### LC-MS/MS and search parameter settings

Protein spots were excised from gels and tryptically digested according to the method by Shevchenko et al. [1]. Peptide extracts were dissolved in 0.1% formic acid and separated on a nano-HPLC system (Ultimate 3000™, LC Packings, Amsterdam, Netherlands). 70µl samples were injected and concentrated on the loading column (LC Packings C18 Pep-Map™, 5 µm, 100 Å, 300µm inner diameter x 1mm) for 5 min using 0.1% formic acid as isocratic solvent at a flow rate of 20 µl/min. The column was then switched into the nanoflow circuit, and the sample was loaded on the nanocolumn (LC-Packings C18 PepMap™, 75 µm inner diameter x 150 mm) at a flow rate of 300 nl/min and separated using the following gradient: solvent A: water, 0.3% formic acid, solvent B: acetonitrile/water 80/20 (v/v), 0.3% formic acid; 0 to 5 minutes: 4% B, after 40 minutes 55% B, then for 5 minutes 90% B and 47 minutes reequilibration at 4% B. The sample was ionized in a Finnigan nano-ESI source equipped with NanoSpray tips (PicoTip™ Emitter, New Objective, Woburn, MA, USA) and analysed in a Thermo-Finnigan LTQ linear iontrap mass-spectrometer (Thermo, San Jose, CA, USA). The MS/MS data were analyzed by searching the SwissProt public database with SpectrumMill Rev. 03.03.078 (Agilent, Darmstadt, GER) software (for more details see supplementary data). Acceptance parameters was a perotein score of more than 20 and individual peptide scores above 7.5

### Chemicals

|                                       |               |
|---------------------------------------|---------------|
| NH <sub>4</sub> HCO <sub>3</sub>      | Sigma A-6141  |
| CaCl <sub>2</sub> .2 H <sub>2</sub> O | Merck 102382  |
| Acetonitrile HPLC grade               | Merck UN 1648 |
| DTT                                   | Sigma D-0632  |
| IAA                                   | Sigma I-1149  |
| Modified Trypsin sequencing grade     | Promega V5111 |

---

## General MS/MS Search Parameters

### Data Extraction

“Peak List Files” from RAW-data were created using the “Data Extractor” of the “Agilent - Spectrum Mill” Software (Rev. A. 03.03.084). The following settings were used:

N-terminus: Hydrogen  
C-terminus : Free acid  
Cys modification: Carbamidomethylation  
Sequence tag length > 1  
MH+: 400 – 4000 Da  
Scan time: 0 – 70 min  
Merge Scans +/- 0.1 sec, +/- 0.1 m/z  
Find charge  
Maximum z = 3  
Minimum S/N : 3  
Find <sup>12</sup>C

### MS/MS Search

The database used was the “homo sapiens” subset of the SwissProt database, downloaded on 13.3.2013 from <ftp://ftp.ncbi.nih.gov/blast/db/FASTA/>, containing 454402 entries.

Database searching was performed with the “MS/MS Search” feature of the “Agilent - Spectrum Mill” Software (Rev. 03.03.078) and the following settings were used:

Enzyme: Trypsin  
N-terminus: Hydrogen  
C-terminus : free acid  
Allowed missed cleavages: 2  
Cys modification: carbamidomethylation  
Variable modifications: Oxidized (Met)  
Pyro (N-term Glu)  
Acrylamide (Cys)  
Sequence tag length > 3

Minimum detected. Peaks: 4

Minimum matched peak intensity: 50%

Precursor mass tolerance: +/- 2.5 Da

Product mass tolerance: +/- 0.7 Da

|                        |                           |      |
|------------------------|---------------------------|------|
| Acceptance parameters: | minimum protein score:    | 20   |
|                        | Individual peptide score: | >7.5 |
|                        | SPI value :               | > 75 |

[1] Shevchenko, A., Wilm, M., Vorm, O., Mann, M., Mass spectrometric sequencing of proteins silver-stained polyacrylamide gels. *Anal. Chem.* 1996, 68, 850-858.

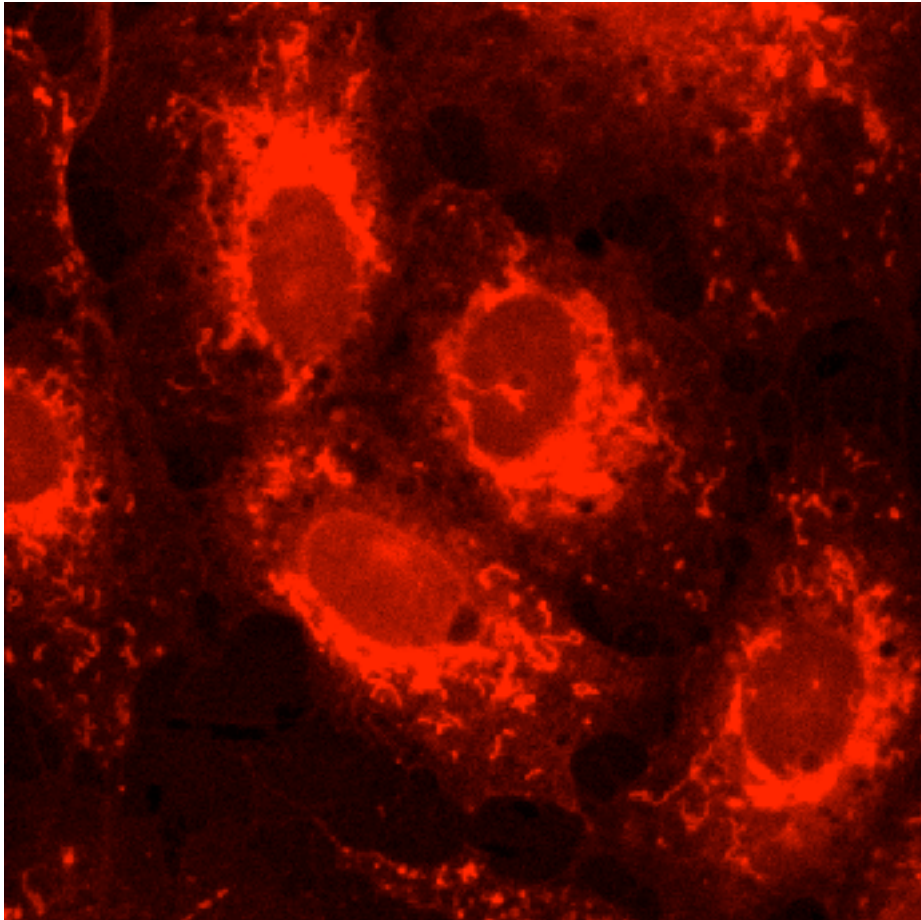

**Fig. S1: Visualization of protein-2-CIHdyA-TAMRA adducts by confocal laser scanning microscopy in hCMEC/D3 cells**

Cells grown on plastic chamber slides were incubated in the presence of 2-CIHdyA (25  $\mu$ M) for 30 min, fixed in methanol, permeabilized with Triton X-100, and subjected to click chemistry with  $N_3$ -TAMRA. Cells were mounted in Moviol and analyzed by confocal laser scanning microscopy. For better visualization of cell borders, micrographs were overexposed by 50 %.

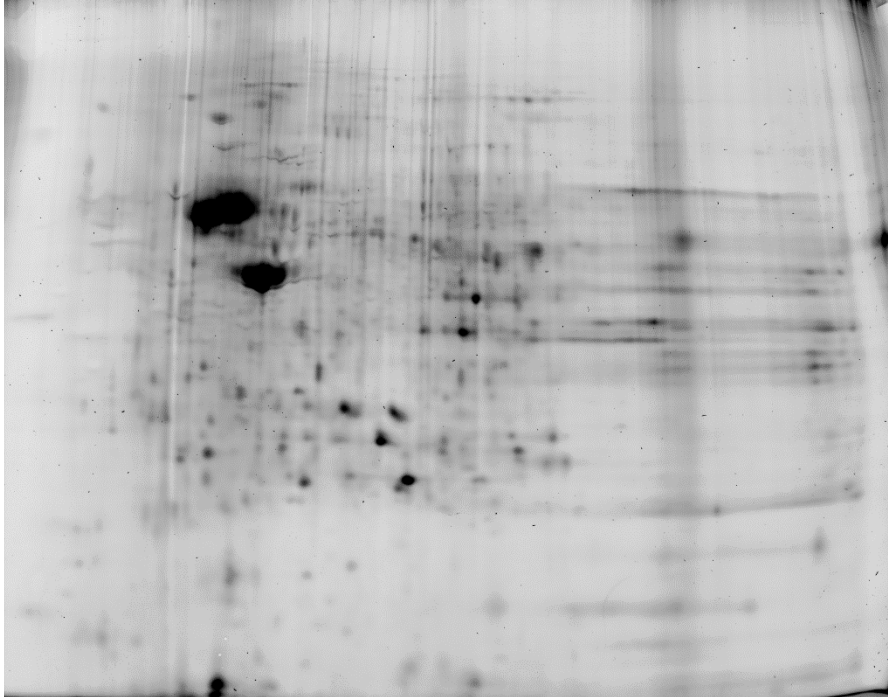

**Fig. S2A: Grey scale image of a representative 2D gel utilized for separation of total hCMEC/D3 cell lysates**

hCMEC/D3 cells plated in collagen-coated 10 cm culture dishes were grown to confluence and incubated in the presence of 50  $\mu$ M 2-ClHDyA for 30 min at 37°C. Subsequently, cells were washed with PBS and Schiff bases were reduced to stable amines. Cells were washed again, scraped in 300  $\mu$ l 'clicking buffer' and clicked with N<sub>3</sub>-TAMRA. Separation in the first and second dimension was performed as described in Materials and Methods. Fluorescence imaging was performed on a Typhoon 9400 scanner. Fluorescent protein spots were picked, tryptically digested and identified by LC-MS/MS.

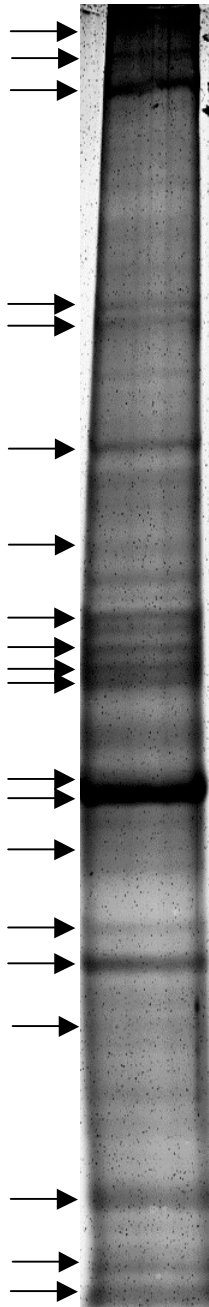

**Fig. S2B: Grey scale image of a representative 1D gel utilized for membrane protein separation**

hCMEC/D3 cells plated in collagen-coated 10 cm culture dishes were grown to confluence and incubated in the presence of 50  $\mu$ M 2-ClHDyA for 30 min at 37°C. Cells were washed with PBS and Schiff bases were reduced to stable amines. Cells were washed again, scraped in 300  $\mu$ l 'clicking buffer' and clicked with N<sub>3</sub>-TAMRA. Separation was performed on self-cast 20 cm PA-SDS gels (12%). Fluorescence imaging was performed on a Typhoon 9400 scanner. Fluorescent bands indicated by arrows were picked, tryptically digested, and identified by LC-MS/MS.

TABLE S1: 2-CIDyA-tagged proteins identified by LC-MS/MS after 2-D gel electrophoresis of total cell lysates

| Protein name                                                                          | UniProt accession number | Spot | Spectra | Distinct peptides | Distinct summed MS/MS search score | % AA coverage | Molecular mass (Da) | Molecular mass exper. (Da) | Cell lysate 1 |           | Cell lysate 2 |           |
|---------------------------------------------------------------------------------------|--------------------------|------|---------|-------------------|------------------------------------|---------------|---------------------|----------------------------|---------------|-----------|---------------|-----------|
|                                                                                       |                          |      |         |                   |                                    |               |                     |                            | pi            | pl exper. | pi            | pl exper. |
| Myosin-9                                                                              | P35579.4                 | 365  | 35      | 13                | 222.06                             | 8             | 226533.4            | 103702                     | 5.50          | 5.10      |               |           |
|                                                                                       |                          | 865  | 80      | 22                | 390.80                             | 12            | 226533.4            | 98336                      | 5.50          | 5.25      |               |           |
|                                                                                       |                          | 923  | 45      | 15                | 242.00                             | 9             | 226533.4            | 94877                      | 5.50          | 5.15      |               |           |
|                                                                                       |                          | 791  | 167     | 34                | 605.53                             | 18            | 226533.4            | 94840                      | 5.50          | 5.25      |               |           |
| Vimentin                                                                              | P08670.4                 | 840  | 44      | 15                | 258.54                             | 36            | 53651.9             | 55364                      | 5.06          | 5.25      |               |           |
|                                                                                       |                          | 858  | 238     | 29                | 531.06                             | 64            | 53651.9             | 53409                      | 5.06          | 4.70      |               |           |
|                                                                                       |                          | 870  | 137     | 26                | 458.99                             | 59            | 53651.9             | 54374                      | 5.06          | 4.90      |               |           |
|                                                                                       |                          | 1664 | 364     | 38                | 633.46                             | 67            | 53651.9             | 57759                      | 5.06          | 4.90      |               |           |
|                                                                                       |                          | 1653 | 71      | 18                | 309.11                             | 43            | 53651.9             | 56930                      | 5.06          | 4.85      |               |           |
|                                                                                       |                          | 1285 | 34      | 12                | 198.39                             | 27            | 53651.9             | 58287                      | 5.06          | 5.20      |               |           |
|                                                                                       |                          | 1330 | 188     | 28                | 479.43                             | 58            | 53651.9             | 57334                      | 5.06          | 4.95      |               |           |
|                                                                                       |                          | 1344 | 513     | 32                | 570.04                             | 65            | 53651.9             | 56401                      | 5.06          | 4.70      |               |           |
|                                                                                       |                          | 1408 | 157     | 24                | 426.03                             | 54            | 53651.9             | 53715                      | 5.06          | 4.30      |               |           |
|                                                                                       |                          | 1509 | 37      | 14                | 226.47                             | 31            | 53651.9             | 48819                      | 5.06          | 4.65      |               |           |
| ATP synthase subunit beta, mitochondrial                                              | P06576.3                 | 840  | 9       | 7                 | 111.58                             | 18            | 56560.2             | 55364                      | 5.26          | 5.25      |               |           |
|                                                                                       |                          | 858  | 10      | 6                 | 107.33                             | 16            | 56560.2             | 53409                      | 5.26          | 4.70      |               |           |
|                                                                                       |                          | 870  | 385     | 25                | 521.47                             | 72            | 56560.2             | 54374                      | 5.26          | 4.90      |               |           |
|                                                                                       |                          | 1653 | 218     | 21                | 429.53                             | 64            | 56560.2             | 56830                      | 5.26          | 4.85      |               |           |
|                                                                                       |                          | 1330 | 234     | 22                | 454.09                             | 70            | 56560.2             | 57334                      | 5.26          | 4.95      |               |           |
| 1344                                                                                  | 77                       | 17   | 325.11  | 63                | 56560.2                            | 56401         | 5.26                | 4.70                       |               |           |               |           |
| Putative elongation factor 1-<br>alpha-like 3                                         | Q5VTE0.1                 | 938  | 212     | 14                | 275.33                             | 50            | 50185.3             | 48078                      | 9.15          | 9.90      |               |           |
|                                                                                       |                          | 1699 | 133     | 13                | 247.41                             | 48            | 50185.3             | 52454                      | 9.15          | 9.95      |               |           |
|                                                                                       |                          | 1700 | 196     | 14                | 265.92                             | 50            | 50185.3             | 53294                      | 9.15          | 8.50      |               |           |
|                                                                                       |                          | 1425 | 255     | 17                | 297.90                             | 48            | 50185.3             | 51191                      | 9.15          | 9.95      |               |           |
| 1533                                                                                  | 7                        | 3    | 43.66   | 6                 | 50185.3                            | 46590         | 9.15                | 8.40                       |               |           |               |           |
| Alpha-enolase                                                                         | P06733.2                 | 958  | 447     | 28                | 527.45                             | 73            | 47169.2             | 47262                      | 7.01          | 6.90      |               |           |
|                                                                                       |                          | 965  | 36      | 5                 | 106.17                             | 20            | 47169.2             | 47262                      | 7.01          | 5.20      |               |           |
|                                                                                       |                          | 981  | 87      | 18                | 315.04                             | 48            | 47169.2             | 45688                      | 7.01          | 6.45      |               |           |
|                                                                                       |                          | 1012 | 16      | 9                 | 128.84                             | 21            | 47169.2             | 44188                      | 7.01          | 6.95      |               |           |
|                                                                                       |                          | 1725 | 481     | 29                | 530.93                             | 74            | 47169.2             | 50034                      | 7.01          | 7.35      |               |           |
|                                                                                       |                          | 1733 | 108     | 18                | 335.51                             | 55            | 47169.2             | 50034                      | 7.01          | 6.55      |               |           |
|                                                                                       |                          | 1737 | 51      | 13                | 228.56                             | 39            | 47169.2             | 52872                      | 7.01          | 6.35      |               |           |
|                                                                                       |                          | 1767 | 413     | 28                | 517.39                             | 73            | 47169.2             | 48501                      | 7.01          | 6.95      |               |           |
|                                                                                       |                          | 1802 | 10      | 4                 | 73.66                              | 13            | 47169.2             | 47758                      | 7.01          | 7.05      |               |           |
|                                                                                       |                          | 1427 | 250     | 24                | 451.61                             | 70            | 47169.2             | 50384                      | 7.01          | 6.65      |               |           |
|                                                                                       |                          | 1442 | 40      | 8                 | 144.88                             | 26            | 47169.2             | 51191                      | 7.01          | 5.30      |               |           |
|                                                                                       |                          | 1448 | 27      | 11                | 185.34                             | 30            | 47169.2             | 50384                      | 7.01          | 6.10      |               |           |
|                                                                                       |                          | 1470 | 7       | 4                 | 66.08                              | 9             | 47169.2             | 49593                      | 7.01          | 6.40      |               |           |
| 1471                                                                                  | 682                      | 28   | 519.19  | 73                | 47169.2                            | 48819         | 7.01                | 7.30                       |               |           |               |           |
| 1476                                                                                  | 395                      | 25   | 465.05  | 72                | 47169.2                            | 48819         | 7.01                | 6.95                       |               |           |               |           |
| 1533                                                                                  | 19                       | 3    | 61.04   | 11                | 47169.2                            | 46590         | 7.01                | 8.40                       |               |           |               |           |
| Lupus La protein                                                                      | P05456.2                 | 958  | 51      | 17                | 279.17                             | 46            | 46837.3             | 47262                      | 6.68          | 6.90      |               |           |
|                                                                                       |                          | 981  | 89      | 22                | 353.36                             | 51            | 46837.3             | 45688                      | 6.68          | 6.45      |               |           |
|                                                                                       |                          | 1733 | 15      | 8                 | 142.77                             | 26            | 46837.3             | 50034                      | 6.68          | 6.55      |               |           |
|                                                                                       |                          | 1767 | 6       | 4                 | 79.89                              | 13            | 46837.3             | 48501                      | 6.68          | 6.95      |               |           |
|                                                                                       |                          | 1427 | 90      | 23                | 384.47                             | 56            | 46837.3             | 50384                      | 6.68          | 6.65      |               |           |
|                                                                                       |                          | 1442 | 16      | 6                 | 108.22                             | 19            | 46837.3             | 51191                      | 6.68          | 5.90      |               |           |
|                                                                                       |                          | 1448 | 28      | 10                | 146.08                             | 32            | 46837.3             | 50384                      | 6.68          | 6.10      |               |           |
| 1470                                                                                  | 6                        | 4    | 62.11   | 13                | 46837.3                            | 49593         | 6.68                | 6.40                       |               |           |               |           |
| 1476                                                                                  | 20                       | 10   | 169.56  | 32                | 46837.3                            | 48819         | 6.68                | 6.95                       |               |           |               |           |
| Rab GDP dissociation inhibitor<br>beta                                                | P50395.2                 | 958  | 20      | 10                | 145.85                             | 27            | 50663.5             | 47262                      | 6.11          | 6.90      |               |           |
|                                                                                       |                          | 1737 | 128     | 26                | 483.58                             | 71            | 50663.5             | 52872                      | 6.11          | 6.35      |               |           |
|                                                                                       |                          | 1427 | 116     | 24                | 427.78                             | 71            | 50663.5             | 50384                      | 6.11          | 6.65      |               |           |
|                                                                                       |                          | 1442 | 35      | 10                | 175.28                             | 24            | 50663.5             | 51191                      | 6.11          | 5.90      |               |           |
|                                                                                       |                          | 1448 | 98      | 24                | 397.97                             | 65            | 50663.5             | 50384                      | 6.11          | 6.10      |               |           |
| 1470                                                                                  | 124                      | 26   | 418.65  | 75                | 50663.5                            | 49593         | 6.11                | 6.40                       |               |           |               |           |
| 1476                                                                                  | 12                       | 5    | 78.97   | 14                | 50663.5                            | 48819         | 6.11                | 6.95                       |               |           |               |           |
| Eukaryotic initiation factor 4A-I                                                     | P60842.1                 | 965  | 299     | 27                | 491.88                             | 71            | 46154.2             | 47262                      | 5.32          | 5.20      |               |           |
|                                                                                       |                          | 1763 | 211     | 24                | 447.33                             | 68            | 46154.2             | 50034                      | 5.32          | 5.25      |               |           |
|                                                                                       |                          | 1457 | 95      | 16                | 278.05                             | 47            | 46154.2             | 51191                      | 5.32          | 5.25      |               |           |
|                                                                                       |                          | 1555 | 67      | 15                | 287.72                             | 47            | 46154.2             | 45179                      | 5.32          | 5.25      |               |           |
|                                                                                       |                          | 1590 | 8       | 5                 | 77.21                              | 15            | 46154.2             | 44496                      | 5.32          | 5.05      |               |           |
| 1601                                                                                  | 19                       | 6    | 112.22  | 20                | 46154.2                            | 44496         | 5.32                | 5.45                       |               |           |               |           |
| Cartilage-associated protein                                                          | O75718.1                 | 965  | 25      | 9                 | 149.93                             | 28            | 46562.1             | 47262                      | 5.50          | 5.20      |               |           |
|                                                                                       |                          | 1763 | 4       | 3                 | 37.90                              | 5             | 46562.1             | 50034                      | 5.50          | 5.25      |               |           |
|                                                                                       |                          | 1457 | 21      | 6                 | 103.41                             | 17            | 46562.1             | 51191                      | 5.50          | 5.25      |               |           |
| Elongation factor 1-gamma                                                             | P26641.3                 | 981  | 212     | 24                | 431.73                             | 63            | 50119.1             | 45688                      | 6.25          | 6.45      |               |           |
|                                                                                       |                          | 1733 | 222     | 21                | 396.56                             | 60            | 50119.1             | 50034                      | 6.25          | 6.55      |               |           |
|                                                                                       |                          | 1737 | 71      | 16                | 283.97                             | 48            | 50119.1             | 52872                      | 6.25          | 6.35      |               |           |
|                                                                                       |                          | 1427 | 355     | 28                | 522.64                             | 78            | 50119.1             | 50384                      | 6.25          | 6.65      |               |           |
|                                                                                       |                          | 1448 | 12      | 5                 | 76.87                              | 16            | 50119.1             | 50384                      | 6.25          | 6.10      |               |           |
| 1470                                                                                  | 13                       | 5    | 75.21   | 10                | 50119.1                            | 49593         | 6.25                | 6.40                       |               |           |               |           |
| Eukaryotic initiation factor 4A-III                                                   | P38919.4                 | 981  | 56      | 15                | 222.15                             | 39            | 46871.3             | 45688                      | 6.30          | 6.45      |               |           |
|                                                                                       |                          | 1733 | 72      | 19                | 309.28                             | 53            | 46871.3             | 50034                      | 6.30          | 6.55      |               |           |
|                                                                                       |                          | 1767 | 83      | 17                | 280.15                             | 53            | 46871.3             | 48501                      | 6.30          | 6.95      |               |           |
|                                                                                       |                          | 1427 | 163     | 21                | 367.40                             | 61            | 46871.3             | 50384                      | 6.30          | 6.65      |               |           |
| Isocitrate dehydrogenase [NADP]<br>cytoplasmic                                        | O75874.2                 | 1012 | 97      | 19                | 329.69                             | 54            | 46659.6             | 44188                      | 6.53          | 6.95      |               |           |
|                                                                                       |                          | 1802 | 77      | 20                | 340.08                             | 60            | 46659.6             | 47758                      | 6.53          | 7.05      |               |           |
|                                                                                       |                          | 1561 | 136     | 19                | 350.55                             | 54            | 46659.6             | 45179                      | 6.53          | 7.10      |               |           |
| Pyruvate dehydrogenase E1<br>component subunit alpha,<br>cytosolic form mitochondrial | P08559.3                 | 1012 | 15      | 8                 | 125.92                             | 23            | 43295.9             | 44188                      | 8.35          | 6.95      |               |           |
|                                                                                       |                          | 1802 | 55      | 15                | 249.46                             | 46            | 43295.9             | 47758                      | 8.35          | 7.05      |               |           |
|                                                                                       |                          | 1561 | 18      | 4                 | 61.07                              | 9             | 43295.9             | 45179                      | 8.35          | 7.10      |               |           |
| Plasminogen activator inhibitor 1                                                     | P05121.1                 | 1012 | 11      | 3                 | 45.59                              | 10            | 45060.2             | 44188                      | 6.67          | 6.95      |               |           |
|                                                                                       |                          | 1725 | 11      | 4                 | 80.86                              | 12            | 45060.2             | 50034                      | 6.67          | 7.35      |               |           |
|                                                                                       |                          | 1767 | 37      | 11                | 189.34                             | 40            | 45060.2             | 48501                      | 6.67          | 6.95      |               |           |
|                                                                                       |                          | 1802 | 19      | 6                 | 97.16                              | 21            | 45060.2             | 47758                      | 6.67          | 7.05      |               |           |
| 1476                                                                                  | 6                        | 4    | 53.41   | 14                | 45060.2                            | 48819         | 6.67                | 6.95                       |               |           |               |           |
| Interleukin enhancer-binding<br>factor 2                                              | Q12905.2                 | 1040 | 44      | 11                | 188.54                             | 46            | 43062.4             | 41398                      | 5.19          | 5.25      |               |           |
|                                                                                       |                          | 1853 | 8       | 6                 | 100.80                             | 22            | 43062.4             | 46671                      | 5.19          | 5.35      |               |           |
|                                                                                       |                          | 1554 | 10      | 4                 | 65.08                              | 15            | 43062.4             | 45179                      | 5.19          | 5.15      |               |           |
|                                                                                       |                          | 1555 | 61      | 10                | 176.45                             | 36            | 43062.4             | 45179                      | 5.19          | 5.25      |               |           |
| 1801                                                                                  | 8                        | 4    | 68.40   | 14                | 43062.4                            | 44496         | 5.19                | 5.45                       |               |           |               |           |



|                                                            |          |               |          |      |         |       |         |       |         |       |
|------------------------------------------------------------|----------|---------------|----------|------|---------|-------|---------|-------|---------|-------|
| Poly(rC)-binding protein 2                                 | Q15366.1 | 1097          | 16       | 6    | 103.41  | 23    | 38580.3 | 40742 | 6.33    | 6.65  |
|                                                            |          | 1164          | 16       | 5    | 75.41   | 15    | 38580.3 | 38269 | 6.33    | 6.50  |
|                                                            |          | 1951          | 13       | 4    | 62.18   | 12    | 38580.3 | 41706 | 6.33    | 6.85  |
|                                                            |          | 2180          | 10       | 5    | 85.80   | 16    | 38580.3 | 38244 | 6.33    | 6.25  |
|                                                            |          | 1665          | 22       | 6    | 101.46  | 20    | 38580.3 | 41282 | 6.33    | 6.65  |
| 1699                                                       | 10       | 4             | 63.00    | 12   | 38580.3 | 39509 | 6.33    | 6.90  |         |       |
| 1736                                                       | 5        | 3             | 42.19    | 9    | 38580.3 | 37842 | 6.33    | 7.90  |         |       |
| 1795                                                       | 87       | 8             | 135.97   | 25   | 38580.3 | 36787 | 6.33    | 7.75  |         |       |
| Twinfilin-2                                                | Q6IBS0.2 | 1153          | 60       | 11   | 204.02  | 44    | 39548.2 | 38269 | 6.37    | 6.80  |
|                                                            |          | 1951          | 33       | 9    | 159.33  | 36    | 39548.2 | 41706 | 6.37    | 6.85  |
|                                                            |          | 1665          | 31       | 7    | 125.09  | 31    | 39548.2 | 41282 | 6.37    | 6.65  |
|                                                            |          | 1699          | 37       | 10   | 184.54  | 47    | 39548.2 | 39509 | 6.37    | 6.90  |
| Acetyl-CoA acetyltransferase, cytosolic                    | Q9BWD1.2 | 1153          | 94       | 11   | 197.62  | 44    | 41351.1 | 38269 | 6.47    | 6.80  |
|                                                            |          | 1164          | 53       | 10   | 183.27  | 49    | 41351.1 | 38269 | 6.47    | 6.50  |
|                                                            |          | 1951          | 51       | 9    | 171.35  | 41    | 41351.1 | 41706 | 6.47    | 6.85  |
|                                                            |          | 1665          | 63       | 11   | 180.24  | 44    | 41351.1 | 41282 | 6.47    | 6.65  |
|                                                            |          | 1699          | 97       | 12   | 227.73  | 51    | 41351.1 | 39509 | 6.47    | 6.90  |
| 1795                                                       | 40       | 9             | 156.26   | 42   | 41351.1 | 36787 | 6.47    | 7.75  |         |       |
| Mitogen-activated protein kinase 1                         | P28482.3 | 1153          | 18       | 9    | 135.63  | 30    | 41389.9 | 38269 | 6.50    | 6.80  |
|                                                            |          | 1951          | 21       | 8    | 118.23  | 24    | 41389.9 | 41706 | 6.50    | 6.85  |
|                                                            |          | 1699          | 24       | 8    | 130.31  | 24    | 41389.9 | 39509 | 6.50    | 6.90  |
| Sialic acid synthase                                       | Q9NR45.2 | 1153          | 12       | 3    | 61.59   | 12    | 40307.8 | 38269 | 6.29    | 6.80  |
|                                                            |          | 1164          | 13       | 3    | 60.59   | 12    | 40307.8 | 38269 | 6.29    | 6.50  |
|                                                            |          | 1951          | 20       | 6    | 110.07  | 20    | 40307.8 | 41706 | 6.29    | 6.85  |
|                                                            |          | 1665          | 24       | 4    | 83.53   | 20    | 40307.8 | 41282 | 6.29    | 6.65  |
| 1699                                                       | 25       | 4             | 85.01    | 20   | 40307.8 | 39509 | 6.29    | 6.90  |         |       |
| Eukaryotic translation initiation factor 3 subunit H       | O15372.1 | 1164          | 42       | 9    | 147.79  | 30    | 39930.5 | 38269 | 6.09    | 6.50  |
|                                                            |          | 1951          | 27       | 7    | 124.08  | 24    | 39930.5 | 41706 | 6.09    | 6.85  |
|                                                            |          | 1603          | 11       | 3    | 44.81   | 7     | 39930.5 | 43826 | 6.09    | 6.60  |
|                                                            |          | 1665          | 95       | 17   | 273.34  | 52    | 39930.5 | 41282 | 6.09    | 6.65  |
| Heterogeneous nuclear ribonucleoproteins A2/B1             | P22626.2 | 1173          | 86       | 13   | 225.37  | 43    | 37429.9 | 39745 | 8.97    | 9.90  |
|                                                            |          | 2109          | 26       | 7    | 121.50  | 22    | 37429.9 | 37708 | 8.97    | 9.60  |
|                                                            |          | 2125          | 20       | 8    | 132.60  | 24    | 37429.9 | 35666 | 8.97    | 9.95  |
|                                                            |          | 2180          | 13       | 5    | 79.13   | 16    | 37429.9 | 38244 | 8.97    | 8.25  |
|                                                            |          | 2217          | 18       | 6    | 101.27  | 20    | 37429.9 | 36161 | 8.97    | 8.15  |
|                                                            |          | 2272          | 31       | 8    | 138.86  | 24    | 37429.9 | 34706 | 8.97    | 9.50  |
|                                                            |          | 1803          | 11       | 3    | 41.35   | 7     | 37429.9 | 35284 | 8.97    | 9.95  |
|                                                            |          | 1665          | 24       | 4    | 83.53   | 20    | 40307.8 | 41282 | 6.29    | 6.65  |
| Glyceraldehyde-3-phosphate dehydrogenase                   | P04406.3 | 1173          | 50       | 9    | 149.92  | 36    | 36053.4 | 39745 | 8.57    | 9.90  |
|                                                            |          | 1205          | 18       | 7    | 103.04  | 28    | 36053.4 | 36023 | 8.57    | 8.20  |
|                                                            |          | 2109          | 230      | 18   | 339.09  | 64    | 36053.4 | 37708 | 8.57    | 9.60  |
|                                                            |          | 2125          | 33       | 8    | 151.47  | 36    | 36053.4 | 35666 | 8.57    | 9.95  |
| 2180                                                       | 138      | 12            | 221.22   | 49   | 36053.4 | 38244 | 8.57    | 8.25  |         |       |
| 1667                                                       | 36       | 8             | 122.96   | 34   | 36053.4 | 40088 | 8.57    | 7.15  |         |       |
| Annexin A2                                                 | P07355.2 | 1205          | 84       | 17   | 292.01  | 55    | 38604.2 | 36023 | 7.58    | 8.20  |
|                                                            |          | 1209          | 14       | 6    | 97.75   | 21    | 38604.2 | 36023 | 7.58    | 7.25  |
|                                                            |          | 2135          | 39       | 12   | 183.56  | 43    | 38604.2 | 37182 | 7.58    | 6.75  |
|                                                            |          | 2177          | 55       | 12   | 204.57  | 43    | 38604.2 | 37182 | 7.58    | 6.45  |
|                                                            |          | 2180          | 228      | 21   | 396.10  | 60    | 38604.2 | 38244 | 7.58    | 8.25  |
|                                                            |          | 2185          | 25       | 9    | 144.53  | 31    | 38604.2 | 37182 | 7.58    | 6.60  |
|                                                            |          | 2215          | 183      | 23   | 403.61  | 69    | 38604.2 | 36161 | 7.58    | 7.35  |
|                                                            |          | 2217          | 287      | 24   | 458.15  | 71    | 38604.2 | 36161 | 7.58    | 8.15  |
|                                                            |          | 2220          | 142      | 22   | 394.18  | 67    | 38604.2 | 36161 | 7.58    | 7.75  |
|                                                            |          | 1687          | 345      | 26   | 492.05  | 72    | 38604.2 | 40088 | 7.58    | 7.15  |
|                                                            |          | 1736          | 202      | 23   | 421.79  | 69    | 38604.2 | 37842 | 7.58    | 7.90  |
|                                                            |          | 1743          | 50       | 14   | 240.60  | 47    | 38604.2 | 37842 | 7.58    | 6.70  |
|                                                            |          | 1746          | 122      | 21   | 358.04  | 67    | 38604.2 | 37309 | 7.58    | 7.35  |
|                                                            |          | Transaldolase | P37837.2 | 1209 | 5       | 3     | 49.08   | 10    | 37540.3 | 36023 |
| 2135                                                       | 27       |               |          | 9    | 141.23  | 27    | 37540.3 | 37182 | 6.36    | 6.75  |
| 2177                                                       | 44       |               |          | 12   | 189.48  | 33    | 37540.3 | 37182 | 6.36    | 6.45  |
| 2185                                                       | 32       |               |          | 10   | 160.38  | 28    | 37540.3 | 37182 | 6.36    | 6.60  |
| 1743                                                       | 63       |               |          | 13   | 227.23  | 37    | 37540.3 | 37842 | 6.36    | 6.70  |
| 1746                                                       | 8        | 5             | 71.99    | 17   | 37540.3 | 37309 | 6.36    | 7.35  |         |       |
| 1806                                                       | 12       | 5             | 79.79    | 14   | 37540.3 | 35775 | 6.36    | 5.45  |         |       |
| Guanine nucleotide-binding protein G(i)(G(s))/G(t) subunit | P62879.3 | 1226          | 38       | 6    | 103.35  | 21    | 37331.3 | 35494 | 5.60    | 5.40  |
|                                                            |          | 2182          | 84       | 13   | 232.12  | 48    | 37331.3 | 37182 | 5.60    | 5.45  |
|                                                            |          | 1806          | 126      | 12   | 233.37  | 48    | 37331.3 | 35775 | 5.60    | 5.45  |
| 60S acidic ribosomal protein P0                            | P05388.1 | 1226          | 20       | 6    | 90.66   | 22    | 34273.7 | 35494 | 5.72    | 5.40  |
|                                                            |          | 1250          | 3        | 3    | 52.02   | 15    | 34273.7 | 33984 | 5.72    | 6.65  |
|                                                            |          | 2177          | 37       | 10   | 180.93  | 43    | 34273.7 | 37182 | 5.72    | 6.45  |
|                                                            |          | 1743          | 3        | 3    | 53.73   | 9     | 34273.7 | 37842 | 5.72    | 6.70  |
|                                                            |          | 1806          | 21       | 10   | 157.89  | 37    | 34273.7 | 35775 | 5.72    | 5.45  |
| Annexin A1                                                 | P04083.2 | 1250          | 270      | 23   | 436.83  | 70    | 38714.5 | 33984 | 6.57    | 6.65  |
|                                                            |          | 2177          | 88       | 20   | 362.05  | 66    | 38714.5 | 37182 | 6.57    | 6.45  |
|                                                            |          | 2185          | 255      | 23   | 441.88  | 70    | 38714.5 | 37182 | 6.57    | 6.60  |
|                                                            |          | 1687          | 72       | 18   | 315.53  | 59    | 38714.5 | 40088 | 6.57    | 7.15  |
|                                                            |          | 1743          | 274      | 24   | 456.06  | 72    | 38714.5 | 37842 | 6.57    | 6.70  |
| 1746                                                       | 8        | 4             | 65.83    | 17   | 38714.5 | 37309 | 6.57    | 7.35  |         |       |
| PDZ and LIM domain protein 1                               | O00151.4 | 1250          | 76       | 13   | 243.74  | 59    | 36071.9 | 33984 | 6.56    | 6.65  |
|                                                            |          | 2135          | 163      | 19   | 355.25  | 79    | 36071.9 | 37182 | 6.56    | 6.75  |
|                                                            |          | 2185          | 49       | 11   | 185.07  | 48    | 36071.9 | 37182 | 6.56    | 6.60  |
|                                                            |          | 1743          | 66       | 14   | 231.56  | 60    | 36071.9 | 37842 | 6.56    | 6.70  |
|                                                            |          | 1746          | 4        | 3    | 39.98   | 11    | 36071.9 | 37309 | 6.56    | 7.35  |
| F-actin-capping protein subunit beta                       | P47756.4 | 1350          | 17       | 8    | 124.53  | 38    | 31350.7 | 30057 | 5.36    | 5.55  |
|                                                            |          | 1407          | 9        | 3    | 47.14   | 12    | 31350.7 | 28391 | 5.36    | 5.40  |
|                                                            |          | 2422          | 208      | 16   | 310.44  | 59    | 31350.7 | 29332 | 5.36    | 5.50  |
|                                                            |          | 1876          | 28       | 7    | 105.27  | 25    | 31350.7 | 32122 | 5.36    | 5.65  |
| Glutathione S-transferase omega-1                          | P78417.2 | 1446          | 70       | 11   | 164.64  | 42    | 27566.0 | 26586 | 6.24    | 5.80  |
|                                                            |          | 1493          | 41       | 9    | 134.57  | 36    | 27566.0 | 25140 | 6.24    | 6.15  |
|                                                            |          | 2516          | 10       | 3    | 45.70   | 12    | 27566.0 | 29697 | 6.24    | 5.25  |
|                                                            |          | 2556          | 43       | 8    | 119.11  | 33    | 27566.0 | 28625 | 6.24    | 5.80  |
|                                                            |          | 1982          | 10       | 4    | 55.70   | 17    | 27566.0 | 27662 | 6.24    | 5.85  |
|                                                            |          | 2053          | 52       | 9    | 133.96  | 36    | 27566.0 | 29530 | 6.24    | 5.85  |
| 2066                                                       | 99       | 14            | 216.23   | 46   | 27566.0 | 26406 | 6.24    | 6.25  |         |       |
| Proteasome activator complex subunit 1                     | Q06323.1 | 1446          | 22       | 9    | 158.45  | 37    | 28723.3 | 26586 | 5.78    | 5.80  |
|                                                            |          | 2516          | 7        | 3    | 48.19   | 14    | 28723.3 | 29697 | 5.78    | 5.25  |
|                                                            |          | 2556          | 225      | 20   | 375.37  | 71    | 28723.3 | 28625 | 5.78    | 5.80  |
|                                                            |          | 2048          | 47       | 10   | 159.01  | 39    | 28723.3 | 25530 | 5.78    | 5.75  |
|                                                            |          | 2053          | 144      | 18   | 300.56  | 68    | 28723.3 | 25530 | 5.78    | 5.85  |
|                                                            |          | 2066          | 3        | 3    | 38.29   | 17    | 28723.3 | 26406 | 5.78    | 6.25  |
| Heat shock protein beta-1                                  | P04792.2 | 1502          | 115      | 15   | 267.31  | 85    | 22782.6 | 24353 | 5.98    | 6.05  |
|                                                            |          | 1512          | 16       | 5    | 75.56   | 25    | 22782.6 | 24353 | 5.98    | 5.30  |
|                                                            |          | 2712          | 172      | 14   | 258.80  | 84    | 22782.6 | 26363 | 5.98    | 6.10  |
|                                                            |          | 2752          | 21       | 7    | 102.18  | 35    | 22782.6 | 25488 | 5.98    | 6.60  |
|                                                            |          | 2093          | 72       | 11   | 195.66  | 66    | 22782.6 | 25816 | 5.98    | 6.60  |

|                                                      |          |      |     |    |        |    |          |        |      |      |
|------------------------------------------------------|----------|------|-----|----|--------|----|----------|--------|------|------|
|                                                      |          | 2130 | 196 | 15 | 276.45 | 85 | 22762.6  | 24707  | 5.98 | 6.10 |
|                                                      |          | 2192 | 10  | 3  | 41.37  | 17 | 22762.6  | 22746  | 5.98 | 6.40 |
| Phosphoglycerate mutase 1                            | P18669.2 | 1521 | 33  | 8  | 134.19 | 46 | 28804.1  | 24227  | 6.68 | 7.10 |
|                                                      |          | 2626 | 60  | 8  | 141.49 | 43 | 28804.1  | 26363  | 6.68 | 6.60 |
|                                                      |          | 2662 | 229 | 18 | 329.33 | 79 | 28804.1  | 26666  | 6.68 | 7.15 |
|                                                      |          | 2053 | 13  | 4  | 76.78  | 23 | 28804.1  | 25816  | 6.68 | 6.60 |
|                                                      |          | 2129 | 186 | 13 | 238.62 | 50 | 28804.1  | 24707  | 6.68 | 7.20 |
|                                                      |          | 2130 | 8   | 3  | 47.85  | 16 | 28804.1  | 24707  | 6.68 | 6.10 |
| Peroxiredoxin-6                                      | P30041.3 | 1521 | 14  | 6  | 89.77  | 31 | 25035.1  | 24227  | 6.00 | 7.10 |
|                                                      |          | 2712 | 24  | 8  | 111.20 | 33 | 25035.1  | 26363  | 6.00 | 6.10 |
|                                                      |          | 2752 | 205 | 15 | 273.93 | 66 | 25035.1  | 25488  | 6.00 | 6.60 |
|                                                      |          | 2758 | 38  | 11 | 183.87 | 58 | 25035.1  | 25348  | 6.00 | 7.20 |
|                                                      |          | 2093 | 120 | 13 | 233.94 | 61 | 25035.1  | 25816  | 6.00 | 6.60 |
|                                                      |          | 2129 | 6   | 3  | 39.36  | 12 | 25035.1  | 24707  | 6.00 | 7.20 |
| Rho GDP-dissociation inhibitor 1                     | P52565.3 | 1531 | 41  | 8  | 140.98 | 36 | 23207.2  | 23621  | 5.02 | 4.75 |
|                                                      |          | 2685 | 161 | 13 | 232.20 | 61 | 23207.2  | 25488  | 5.02 | 4.85 |
|                                                      |          | 2110 | 49  | 9  | 145.67 | 29 | 23207.2  | 25816  | 5.02 | 4.75 |
| Lactoylglutathione lyase                             | Q04760.4 | 1531 | 13  | 5  | 69.91  | 26 | 20777.8  | 23621  | 5.12 | 4.75 |
|                                                      |          | 1574 | 56  | 10 | 177.65 | 51 | 20777.8  | 22306  | 5.12 | 4.75 |
|                                                      |          | 2854 | 11  | 4  | 52.68  | 16 | 20777.8  | 25070  | 5.12 | 4.50 |
|                                                      |          | 2110 | 36  | 8  | 129.11 | 42 | 20777.8  | 25816  | 5.12 | 4.75 |
|                                                      |          | 2169 | 79  | 8  | 143.96 | 32 | 20777.8  | 23666  | 5.12 | 4.70 |
| Glutathione S-transferase P                          | P09211.2 | 1569 | 216 | 11 | 224.38 | 65 | 23356.0  | 22512  | 5.43 | 5.45 |
|                                                      |          | 1574 | 12  | 4  | 65.82  | 30 | 23356.0  | 22306  | 5.43 | 4.75 |
|                                                      |          | 2880 | 116 | 9  | 181.67 | 57 | 23356.0  | 23520  | 5.43 | 5.45 |
|                                                      |          | 2198 | 162 | 9  | 186.34 | 57 | 23356.0  | 22746  | 5.43 | 5.45 |
| UMP-CMP kinase                                       | P30085.3 | 1569 | 9   | 3  | 46.56  | 17 | 22222.5  | 22512  | 5.44 | 5.45 |
|                                                      |          | 2880 | 12  | 5  | 76.88  | 28 | 22222.5  | 23520  | 5.44 | 5.45 |
|                                                      |          | 2958 | 22  | 7  | 121.64 | 46 | 22222.5  | 22475  | 5.44 | 5.40 |
|                                                      |          | 2198 | 27  | 5  | 87.15  | 28 | 22222.5  | 22746  | 5.44 | 5.45 |
| Proteasome subunit beta type-3                       | P49720.2 | 1802 | 40  | 5  | 99.96  | 35 | 22949.1  | 18597  | 6.14 | 6.20 |
|                                                      |          | 2910 | 31  | 6  | 112.87 | 38 | 22949.1  | 23520  | 6.14 | 6.30 |
|                                                      |          | 2192 | 51  | 6  | 113.17 | 38 | 22949.1  | 22746  | 6.14 | 6.40 |
| Protein DJ-1                                         | Q99497.2 | 1802 | 21  | 5  | 94.86  | 41 | 19891.2  | 18597  | 6.33 | 6.20 |
|                                                      |          | 2910 | 82  | 10 | 191.75 | 71 | 19891.2  | 23520  | 6.33 | 6.30 |
|                                                      |          | 2192 | 52  | 8  | 140.76 | 46 | 19891.2  | 22746  | 6.33 | 6.40 |
| Galectin-1                                           | P09382.2 | 2154 | 178 | 13 | 236.48 | 85 | 14715.8  | 16217  | 5.34 | 4.80 |
|                                                      |          | 3549 | 28  | 6  | 106.90 | 51 | 14715.8  | 15601  | 5.34 | 4.80 |
|                                                      |          | 2517 | 39  | 8  | 135.04 | 61 | 14715.8  | 15817  | 5.34 | 4.80 |
|                                                      |          | 2533 | 221 | 12 | 216.80 | 85 | 14715.8  | 15580  | 5.34 | 4.80 |
| Major vault protein                                  | Q14764.4 | 360  | 24  | 9  | 160.67 | 13 | 99327.3  | 103702 | 5.34 | 5.35 |
|                                                      |          | 776  | 211 | 37 | 670.88 | 53 | 99327.3  | 103795 | 5.34 | 5.35 |
| POTE ankyrin domain family member F                  | A5A3E0.2 | 360  | 13  | 3  | 52.60  | 3  | 121445.3 | 103702 | 5.83 | 5.35 |
|                                                      |          | 776  | 4   | 2  | 35.03  | 2  | 121445.3 | 103702 | 5.83 | 5.35 |
| Alanine-tRNA ligase, cytoplasmic                     | P49588.2 | 360  | 3   | 3  | 40.55  | 6  | 106811.0 | 103702 | 5.34 | 5.35 |
|                                                      |          | 776  | 98  | 26 | 476.39 | 38 | 106811.0 | 103702 | 5.34 | 5.35 |
| Annexin A7                                           | P20073.3 | 917  | 8   | 4  | 69.56  | 10 | 52739.5  | 48913  | 5.52 | 5.85 |
|                                                      |          | 1737 | 71  | 13 | 224.34 | 30 | 52739.5  | 52872  | 5.52 | 6.35 |
| Eukaryotic translation initiation factor 2 subunit 3 | P41091.3 | 938  | 13  | 3  | 49.71  | 7  | 51109.8  | 48078  | 8.66 | 9.90 |
|                                                      |          | 1700 | 9   | 4  | 56.97  | 12 | 51109.8  | 53294  | 8.66 | 8.50 |
| Proliferation-associated protein 2G4                 | Q9UQ80.3 | 958  | 5   | 3  | 50.59  | 10 | 43787.1  | 47262  | 6.13 | 6.90 |
|                                                      |          | 981  | 153 | 23 | 412.85 | 69 | 43787.1  | 45888  | 6.13 | 6.45 |
|                                                      |          | 1767 | 15  | 7  | 117.84 | 24 | 43787.1  | 48501  | 6.13 | 6.95 |
| Heterogeneous nuclear ribonucleoprotein F            | P52597.3 | 965  | 132 | 15 | 270.15 | 53 | 45672.1  | 47262  | 5.38 | 5.20 |
|                                                      |          | 1763 | 29  | 8  | 136.48 | 30 | 45672.1  | 50034  | 5.38 | 5.25 |
| Heterogeneous nuclear ribonucleoprotein A3           | P51991.2 | 1173 | 65  | 10 | 169.08 | 30 | 39595.1  | 39745  | 9.09 | 9.90 |
|                                                      |          | 2109 | 6   | 3  | 48.46  | 13 | 39595.1  | 37708  | 9.09 | 9.60 |
| L-lactate dehydrogenase A chain                      | P00338.2 | 1334 | 110 | 15 | 264.29 | 42 | 36688.9  | 31242  | 8.44 | 9.35 |
|                                                      |          | 2237 | 30  | 8  | 127.38 | 25 | 36688.9  | 33337  | 8.44 | 9.95 |
|                                                      |          | 2272 | 140 | 17 | 295.37 | 52 | 36688.9  | 34706  | 8.44 | 9.50 |
| Prohibitin                                           | P35232.1 | 1407 | 19  | 7  | 120.12 | 29 | 29804.2  | 28391  | 5.57 | 5.40 |
|                                                      |          | 2556 | 6   | 3  | 41.98  | 11 | 29804.2  | 28625  | 5.57 | 5.80 |
| Chloride intracellular channel protein 1             | O00299.4 | 1410 | 98  | 13 | 230.89 | 73 | 26922.9  | 28217  | 5.09 | 4.95 |
|                                                      |          | 2498 | 261 | 14 | 266.25 | 74 | 26922.9  | 30449  | 5.09 | 4.95 |
| High mobility group protein B1                       | P09429.3 | 1521 | 21  | 5  | 92.63  | 29 | 24893.9  | 24227  | 5.61 | 7.10 |
|                                                      |          | 2626 | 21  | 7  | 103.41 | 25 | 24893.9  | 26363  | 5.61 | 6.60 |
|                                                      |          | 2662 | 29  | 6  | 101.46 | 30 | 24893.9  | 26666  | 5.61 | 7.15 |
| Rho GDP-dissociation inhibitor 2                     | P52566.3 | 1531 | 12  | 4  | 57.34  | 29 | 22988.1  | 23621  | 5.10 | 4.75 |
|                                                      |          | 2685 | 14  | 4  | 66.86  | 29 | 22988.1  | 25488  | 5.10 | 4.85 |
| Fibronectin                                          | P02751.4 | 365  | 4   | 3  | 38.21  | 1  | 262625.9 | 103702 | 5.46 | 5.10 |
|                                                      |          | 852  | 13  | 5  | 85.58  | 2  | 262625.9 | 91468  | 5.46 | 4.90 |
| Interferon-induced GTP-binding protein Mx1           | P20591.4 | 642  | 12  | 3  | 36.53  | 4  | 75520.7  | 70659  | 5.60 | 5.40 |
|                                                      |          | 998  | 296 | 36 | 657.52 | 64 | 75520.7  | 79296  | 5.60 | 5.80 |
| Tubulin beta-4B chain                                | P68371.1 | 858  | 433 | 24 | 472.19 | 73 | 49831.3  | 53409  | 4.79 | 4.70 |
|                                                      |          | 870  | 354 | 23 | 455.88 | 79 | 49831.3  | 54374  | 4.79 | 4.90 |
|                                                      |          | 1509 | 14  | 5  | 70.90  | 9  | 49831.3  | 48819  | 4.79 | 4.65 |
| Tubulin alpha-1C chain                               | Q9BQE3.1 | 870  | 110 | 18 | 340.78 | 54 | 49895.6  | 54374  | 4.96 | 4.90 |
|                                                      |          | 873  | 33  | 11 | 189.88 | 39 | 49895.6  | 50647  | 4.96 | 5.35 |
|                                                      |          | 1427 | 9   | 5  | 74.40  | 14 | 49895.6  | 50384  | 4.96 | 6.65 |
|                                                      |          | 1442 | 12  | 4  | 71.79  | 11 | 49895.6  | 51191  | 4.96 | 5.90 |
|                                                      |          | 1448 | 15  | 7  | 122.43 | 20 | 49895.6  | 50384  | 4.96 | 6.10 |

|                                                          |          |      |     |    |         |    |          |       |      |      |
|----------------------------------------------------------|----------|------|-----|----|---------|----|----------|-------|------|------|
|                                                          |          | 1457 | 12  | 6  | 101.60  | 20 | 49895.6  | 51191 | 4.96 | 5.25 |
|                                                          |          | 1513 | 4   | 3  | 43.23   | 9  | 49895.6  | 48060 | 4.96 | 4.95 |
| RuvB-like 2                                              | Q9Y230.3 | 873  | 36  | 9  | 160.49  | 24 | 51156.8  | 50647 | 5.49 | 5.35 |
|                                                          |          | 1410 | 30  | 11 | 190.88  | 26 | 51156.8  | 52856 | 5.49 | 5.75 |
| Spliceosome RNA helicase DDX39B                          | Q13838.1 | 873  | 26  | 9  | 137.07  | 24 | 48991.6  | 50647 | 5.44 | 5.35 |
|                                                          |          | 1410 | 83  | 16 | 293.46  | 46 | 48991.6  | 52856 | 5.44 | 5.75 |
| Actin-like protein 6A                                    | O96019.1 | 873  | 3   | 3  | 54.55   | 10 | 47461.3  | 50647 | 5.40 | 5.35 |
|                                                          |          | 1457 | 13  | 7  | 114.13  | 21 | 47461.3  | 51191 | 5.40 | 5.25 |
|                                                          |          | 1561 | 16  | 5  | 91.79   | 15 | 47461.3  | 45179 | 5.40 | 7.10 |
| 26S protease regulatory subunit 7                        | P35998.3 | 917  | 80  | 23 | 370.95  | 59 | 48634.1  | 48913 | 5.71 | 5.85 |
|                                                          |          | 1442 | 164 | 25 | 445.93  | 65 | 48634.1  | 51191 | 5.71 | 5.90 |
|                                                          |          | 1448 | 24  | 8  | 133.92  | 21 | 48634.1  | 50384 | 5.71 | 6.10 |
| Heterogeneous nuclear ribonucleoprotein H                | P31943.4 | 917  | 15  | 6  | 91.55   | 17 | 49229.7  | 48913 | 5.89 | 5.85 |
|                                                          |          | 1380 | 192 | 18 | 317.45  | 58 | 49229.7  | 53715 | 5.89 | 6.05 |
|                                                          |          | 1408 | 12  | 3  | 57.79   | 13 | 49229.7  | 53715 | 5.89 | 4.30 |
|                                                          |          | 1442 | 19  | 7  | 117.78  | 21 | 49229.7  | 51191 | 5.89 | 5.90 |
|                                                          |          | 1448 | 68  | 12 | 204.99  | 40 | 49229.7  | 50384 | 5.89 | 6.10 |
| Actin-related protein 3B                                 | Q9P1U1.1 | 917  | 23  | 5  | 79.41   | 15 | 47608.0  | 48913 | 5.61 | 5.85 |
|                                                          |          | 1442 | 19  | 4  | 63.54   | 12 | 47608.0  | 51191 | 5.61 | 5.90 |
| HLA class I histocompatibility antigen, A-11 alpha chain | P13746.1 | 1058 | 17  | 5  | 88.05   | 23 | 40937.0  | 42071 | 5.77 | 5.40 |
|                                                          |          | 1077 | 23  | 9  | 152.15  | 34 | 40937.0  | 41398 | 5.77 | 5.95 |
|                                                          |          | 1601 | 13  | 6  | 99.08   | 26 | 40937.0  | 44496 | 5.77 | 5.45 |
| Adenosine kinase                                         | P55263.2 | 1097 | 55  | 12 | 215.75  | 38 | 40545.7  | 40742 | 6.23 | 6.65 |
|                                                          |          | 1603 | 28  | 7  | 114.16  | 18 | 40545.7  | 43826 | 6.23 | 6.60 |
| HLA class I histocompatibility antigen, A-2 alpha chain  | P01892.1 | 1097 | 31  | 9  | 163.19  | 38 | 40922.1  | 40742 | 6.50 | 6.65 |
|                                                          |          | 1603 | 42  | 13 | 218.92  | 44 | 40922.1  | 43826 | 6.50 | 6.60 |
| Septin-2                                                 | Q15019.1 | 1097 | 23  | 9  | 147.44  | 31 | 41487.7  | 40742 | 6.15 | 6.65 |
|                                                          |          | 1603 | 188 | 19 | 331.72  | 65 | 41487.7  | 43826 | 6.15 | 6.60 |
|                                                          |          | 1665 | 16  | 6  | 96.32   | 22 | 41487.7  | 41282 | 6.15 | 6.65 |
| Mitotic checkpoint protein BUB3                          | O43684.1 | 1153 | 25  | 6  | 97.97   | 20 | 37155.0  | 38269 | 6.37 | 6.80 |
|                                                          |          | 1665 | 12  | 5  | 83.36   | 18 | 37155.0  | 41282 | 6.37 | 6.65 |
|                                                          |          | 1699 | 11  | 5  | 77.12   | 18 | 37155.0  | 39509 | 6.37 | 6.90 |
|                                                          |          | 1795 | 46  | 9  | 155.28  | 32 | 37155.0  | 36767 | 6.37 | 7.75 |
| Mannose-1-phosphate 4-epimerase                          | Q9Y5P6.2 | 1153 | 13  | 4  | 53.96   | 12 | 39834.7  | 38269 | 6.16 | 6.80 |
|                                                          |          | 1795 | 15  | 4  | 62.88   | 12 | 39834.7  | 36767 | 6.16 | 7.75 |
| RNA-binding protein 4                                    | Q9BWF3.1 | 1153 | 5   | 3  | 48.11   | 6  | 40314.1  | 38269 | 6.61 | 6.80 |
|                                                          |          | 1665 | 3   | 3  | 43.23   | 7  | 40314.1  | 41282 | 6.61 | 6.65 |
|                                                          |          | 1699 | 6   | 3  | 45.39   | 7  | 40314.1  | 39509 | 6.61 | 6.90 |
|                                                          |          | 1795 | 7   | 4  | 68.33   | 15 | 40314.1  | 36767 | 6.61 | 7.75 |
| Heterogeneous nuclear ribonucleoprotein A/B              | Q99729.2 | 1153 | 6   | 3  | 45.26   | 7  | 36225.0  | 38269 | 8.21 | 6.80 |
|                                                          |          | 1209 | 24  | 7  | 116.62  | 20 | 36225.0  | 36023 | 8.21 | 7.25 |
|                                                          |          | 1699 | 39  | 10 | 164.12  | 20 | 36225.0  | 39509 | 8.21 | 6.90 |
|                                                          |          | 1746 | 33  | 7  | 118.37  | 19 | 36225.0  | 37309 | 8.21 | 7.35 |
| Ubiquitin-like domain-containing CTD phosphatase 1       | Q8WVY7.2 | 1164 | 7   | 3  | 38.94   | 8  | 36804.8  | 38269 | 6.07 | 6.50 |
|                                                          |          | 1665 | 14  | 5  | 65.91   | 15 | 36804.8  | 41282 | 6.07 | 6.65 |
| Methionine adenosyltransferase 2 subunit beta            | Q9NZL9.1 | 1205 | 4   | 3  | 43.96   | 13 | 37552.0  | 36023 | 6.90 | 8.20 |
|                                                          |          | 1736 | 29  | 7  | 122.21  | 28 | 37552.0  | 37842 | 6.90 | 7.90 |
|                                                          |          | 1746 | 13  | 4  | 75.05   | 17 | 37552.0  | 37309 | 6.90 | 7.35 |
| Heterogeneous nuclear ribonucleoprotein H3               | P31942.2 | 1250 | 9   | 5  | 74.18   | 15 | 36926.7  | 33984 | 6.37 | 6.65 |
|                                                          |          | 1743 | 9   | 4  | 68.33   | 13 | 36926.7  | 37842 | 6.37 | 6.70 |
|                                                          |          | 1746 | 11  | 5  | 71.44   | 15 | 36926.7  | 37309 | 6.37 | 7.35 |
| Ester hydrolase C11                                      | Q9H0W9.1 | 1250 | 5   | 3  | 51.23   | 12 | 35117.6  | 33984 | 6.23 | 6.65 |
|                                                          |          | 1743 | 4   | 3  | 52.27   | 12 | 35117.6  | 37842 | 6.23 | 6.70 |
| Annexin A3                                               | P12429.3 | 1350 | 110 | 16 | 279.46  | 60 | 36375.5  | 30057 | 5.63 | 5.55 |
|                                                          |          | 1876 | 240 | 21 | 369.15  | 63 | 36375.5  | 32122 | 5.63 | 5.65 |
| Tropomyosin alpha-3 chain                                | P06753.1 | 1376 | 89  | 10 | 172.62  | 22 | 32818.9  | 29671 | 4.68 | 4.30 |
|                                                          |          | 1912 | 131 | 15 | 256.97  | 36 | 32818.9  | 31706 | 4.68 | 4.25 |
| 14-3-3 protein epsilon                                   | P62258.1 | 1376 | 28  | 9  | 160.85  | 39 | 29174.1  | 29671 | 4.63 | 4.30 |
|                                                          |          | 1387 | 242 | 18 | 336.54  | 71 | 29174.1  | 29294 | 4.63 | 4.15 |
|                                                          |          | 1912 | 46  | 10 | 173.79  | 40 | 29174.1  | 31706 | 4.63 | 4.25 |
| Enolase-phosphatase E1                                   | Q9UHY7.1 | 1387 | 6   | 3  | 58.27   | 20 | 28932.8  | 29294 | 4.66 | 4.15 |
|                                                          |          | 1912 | 7   | 3  | 53.50   | 16 | 28932.8  | 31706 | 4.66 | 4.25 |
| 6-phosphogluconolactonase                                | O95336.2 | 1502 | 9   | 5  | 71.28   | 26 | 27547.0  | 24353 | 5.70 | 6.05 |
|                                                          |          | 2053 | 18  | 8  | 121.40  | 38 | 27547.0  | 25530 | 5.70 | 5.85 |
| Protein S100-A6                                          | P06703.1 | 2154 | 56  | 3  | 48.63   | 46 | 10179.8  | 16217 | 5.32 | 4.80 |
|                                                          |          | 2533 | 32  | 2  | 34.60   | 16 | 10179.8  | 15580 | 5.32 | 4.80 |
| Alpha-actinin-4                                          | O43707.2 | 865  | 456 | 55 | 1033.53 | 72 | 104854.6 | 98336 | 5.27 | 5.25 |
|                                                          |          | 791  | 421 | 57 | 1069.74 | 74 | 104854.6 | 94840 | 5.27 | 5.25 |
| Elongation factor 2                                      | P13639.4 | 877  | 243 | 36 | 643.31  | 48 | 95338.7  | 96589 | 6.41 | 7.25 |
|                                                          |          | 807  | 357 | 47 | 819.01  | 56 | 95338.7  | 94840 | 6.41 | 7.30 |
| 60 kDa heat shock protein, mitochondrial                 | P10809.2 | 1354 | 184 | 33 | 615.01  | 70 | 61055.0  | 59677 | 5.70 | 5.25 |
|                                                          |          | 1360 | 212 | 34 | 640.98  | 69 | 61055.0  | 59677 | 5.70 | 5.25 |
|                                                          |          | 1266 | 40  | 10 | 180.43  | 23 | 61055.0  | 63360 | 5.70 | 5.50 |
|                                                          |          | 1285 | 3   | 3  | 50.97   | 6  | 61055.0  | 58267 | 5.70 | 5.20 |
| T-complex protein 1 subunit theta                        | P50990.4 | 1354 | 12  | 5  | 78.20   | 9  | 59620.9  | 59677 | 5.42 | 5.25 |
|                                                          |          | 1266 | 261 | 30 | 562.27  | 63 | 59620.9  | 63360 | 5.42 | 5.50 |
| T-complex protein 1 subunit epsilon                      | P48643.1 | 1354 | 7   | 4  | 62.89   | 6  | 59671.4  | 59677 | 5.45 | 5.25 |
|                                                          |          | 1266 | 191 | 29 | 515.78  | 56 | 59671.4  | 63360 | 5.45 | 5.50 |
| T-complex protein 1 subunit beta                         | P78371.4 | 1554 | 16  | 10 | 165.64  | 30 | 57488.5  | 59677 | 6.01 | 6.45 |

|                                                                  |          |      |     |    |        |    |         |       |      |      |
|------------------------------------------------------------------|----------|------|-----|----|--------|----|---------|-------|------|------|
|                                                                  |          | 1303 | 144 | 24 | 445.24 | 66 | 57488.5 | 58287 | 6.01 | 6.60 |
| 4-trimethylaminobutylaldehyde dehydrogenase                      | P49189.3 | 1623 | 7   | 3  | 47.42  | 7  | 53802.2 | 54586 | 5.69 | 5.90 |
|                                                                  |          | 1380 | 7   | 3  | 48.38  | 6  | 53802.2 | 53715 | 5.69 | 6.05 |
|                                                                  |          | 1410 | 36  | 13 | 232.51 | 35 | 53802.2 | 52856 | 5.69 | 5.75 |
| Trifunctional enzyme subunit beta, mitochondrial                 | P55084.3 | 1700 | 5   | 3  | 39.69  | 6  | 51294.8 | 53294 | 9.44 | 8.50 |
|                                                                  |          | 1425 | 31  | 10 | 159.35 | 20 | 51294.8 | 51191 | 9.44 | 9.95 |
| 6-phosphogluconate dehydrogenase, decarboxylating                | P52208.3 | 1725 | 9   | 4  | 68.46  | 11 | 53140.3 | 50034 | 6.80 | 7.35 |
|                                                                  |          | 1471 | 4   | 3  | 42.96  | 6  | 53140.3 | 48819 | 6.80 | 7.30 |
| Elongation factor Tu, mitochondrial                              | P49411.2 | 1767 | 39  | 12 | 188.60 | 31 | 49541.8 | 48501 | 7.26 | 6.95 |
|                                                                  |          | 1802 | 63  | 15 | 250.94 | 40 | 49541.8 | 47758 | 7.26 | 7.05 |
|                                                                  |          | 1561 | 57  | 13 | 204.93 | 34 | 49541.8 | 45179 | 7.26 | 7.10 |
| Phosphoglycerate kinase 1                                        | P00558.3 | 1869 | 127 | 22 | 395.45 | 65 | 44615.0 | 46671 | 8.30 | 8.30 |
|                                                                  |          | 1533 | 159 | 21 | 375.34 | 59 | 44615.0 | 46590 | 8.30 | 8.40 |
| Protein CYR61                                                    | O0622.1  | 1869 | 10  | 5  | 83.93  | 17 | 42026.9 | 46671 | 8.63 | 8.30 |
|                                                                  |          | 1533 | 48  | 13 | 214.40 | 43 | 42026.9 | 46590 | 8.63 | 8.40 |
| Cytosolic acyl coenzyme A thioester hydrolase                    | O00154.3 | 1951 | 14  | 6  | 110.29 | 20 | 41796.3 | 41706 | 8.85 | 6.85 |
|                                                                  |          | 1561 | 25  | 8  | 145.82 | 27 | 41796.3 | 45179 | 8.85 | 7.10 |
|                                                                  |          | 1699 | 11  | 6  | 100.75 | 21 | 41796.3 | 39509 | 8.85 | 6.90 |
| Fructose-bisphosphate aldolase A                                 | P04075.2 | 1964 | 122 | 16 | 290.95 | 59 | 39420.2 | 43277 | 8.30 | 9.50 |
|                                                                  |          | 1736 | 7   | 4  | 50.90  | 12 | 39420.2 | 37842 | 8.30 | 7.90 |
|                                                                  |          | 1795 | 38  | 9  | 160.86 | 30 | 39420.2 | 36767 | 8.30 | 7.75 |
| Heterogeneous nuclear ribonucleoprotein A1                       | P09651.5 | 2125 | 25  | 7  | 118.68 | 24 | 38746.8 | 35666 | 9.17 | 9.95 |
|                                                                  |          | 2272 | 7   | 4  | 64.71  | 14 | 38746.8 | 34706 | 9.17 | 9.50 |
|                                                                  |          | 1803 | 156 | 15 | 271.26 | 43 | 38746.8 | 35284 | 9.17 | 9.95 |
| Heterogeneous nuclear ribonucleoprotein A0                       | Q13151.1 | 2125 | 4   | 3  | 56.71  | 18 | 30840.8 | 35666 | 9.34 | 9.95 |
|                                                                  |          | 1803 | 17  | 5  | 85.63  | 23 | 30840.8 | 35284 | 9.34 | 9.95 |
| Glyoxylate reductase/hydroxypyruvate reductase                   | Q9UBQ7.1 | 2135 | 13  | 3  | 54.41  | 13 | 35668.5 | 37182 | 7.01 | 6.75 |
|                                                                  |          | 2185 | 4   | 3  | 51.19  | 13 | 35668.5 | 37182 | 7.01 | 6.60 |
|                                                                  |          | 1743 | 32  | 8  | 146.01 | 31 | 35668.5 | 37842 | 7.01 | 6.70 |
|                                                                  |          | 1746 | 25  | 6  | 103.11 | 20 | 35668.5 | 37309 | 7.01 | 7.35 |
| Serine/threonine-protein phosphatase PP1-gamma catalytic subunit | P36873.1 | 2177 | 65  | 12 | 219.95 | 43 | 36984.0 | 37182 | 6.12 | 6.45 |
|                                                                  |          | 1743 | 7   | 5  | 71.05  | 18 | 36984.0 | 37842 | 6.12 | 6.70 |
| Malate dehydrogenase, mitochondrial                              | P40926.3 | 2177 | 10  | 7  | 118.32 | 25 | 35503.5 | 37182 | 8.92 | 6.45 |
|                                                                  |          | 2180 | 33  | 10 | 191.56 | 40 | 35503.5 | 38244 | 8.92 | 8.25 |
|                                                                  |          | 1803 | 9   | 5  | 90.29  | 16 | 35503.5 | 35284 | 8.92 | 9.95 |
| Pyruvate dehydrogenase E1 component subunit beta, mitochondrial  | P11177.3 | 2182 | 59  | 12 | 202.31 | 44 | 39233.6 | 37182 | 6.21 | 5.45 |
|                                                                  |          | 1806 | 91  | 14 | 253.78 | 52 | 39233.6 | 35775 | 6.21 | 5.45 |
| F-actin-capping protein subunit alpha-1                          | P52907.3 | 2182 | 80  | 10 | 191.46 | 56 | 32922.9 | 37182 | 5.45 | 5.45 |
|                                                                  |          | 1806 | 121 | 12 | 230.87 | 59 | 32922.9 | 35775 | 5.45 | 5.45 |
| L-lactate dehydrogenase B chain                                  | P07195.2 | 2182 | 9   | 4  | 59.17  | 13 | 36638.7 | 37182 | 5.71 | 5.45 |
|                                                                  |          | 2235 | 178 | 19 | 357.45 | 67 | 36638.7 | 32469 | 5.71 | 5.65 |
|                                                                  |          | 1806 | 35  | 9  | 160.14 | 34 | 36638.7 | 35775 | 5.71 | 5.45 |
|                                                                  |          | 1876 | 49  | 10 | 169.08 | 34 | 36638.7 | 32122 | 5.71 | 5.65 |
| UDP-glucose 4-epimerase                                          | Q14376.2 | 2185 | 15  | 5  | 86.43  | 18 | 38281.9 | 37182 | 6.26 | 6.60 |
|                                                                  |          | 1743 | 34  | 9  | 152.00 | 35 | 38281.9 | 37842 | 6.26 | 6.70 |
| Aflatoxin B1 aldehyde reductase member 2                         | O43488.3 | 2185 | 4   | 4  | 60.24  | 14 | 39589.2 | 37182 | 6.71 | 6.60 |
|                                                                  |          | 1743 | 12  | 5  | 77.21  | 17 | 39589.2 | 37842 | 6.71 | 6.70 |
| Malate dehydrogenase, cytoplasmic                                | P40925.4 | 2215 | 8   | 3  | 45.60  | 9  | 36426.3 | 36161 | 6.91 | 7.35 |
|                                                                  |          | 2217 | 22  | 6  | 98.11  | 20 | 36426.3 | 36161 | 6.91 | 8.15 |
|                                                                  |          | 2220 | 5   | 3  | 41.04  | 10 | 36426.3 | 36161 | 6.91 | 7.75 |
|                                                                  |          | 1687 | 5   | 4  | 57.61  | 13 | 36426.3 | 40088 | 6.91 | 7.15 |
| Inorganic pyrophosphatase                                        | Q15181.2 | 2235 | 44  | 12 | 211.68 | 59 | 32660.2 | 32469 | 5.54 | 5.65 |
|                                                                  |          | 1876 | 3   | 3  | 44.92  | 18 | 32660.2 | 32122 | 5.54 | 5.65 |
| Annexin A5                                                       | P08758.2 | 2330 | 193 | 21 | 375.51 | 73 | 35936.9 | 33337 | 4.94 | 4.70 |
|                                                                  |          | 1866 | 392 | 22 | 408.54 | 74 | 35936.9 | 32979 | 4.94 | 4.70 |
|                                                                  |          | 1876 | 15  | 3  | 51.80  | 15 | 35936.9 | 32122 | 4.94 | 5.65 |
|                                                                  |          | 1879 | 202 | 19 | 341.98 | 70 | 35936.9 | 31706 | 4.94 | 4.55 |
| Elongation factor 1-delta                                        | P29692.5 | 2330 | 4   | 4  | 67.46  | 17 | 31122.0 | 33337 | 4.90 | 4.70 |
|                                                                  |          | 1787 | 76  | 11 | 207.98 | 56 | 31122.0 | 35775 | 4.90 | 4.50 |
|                                                                  |          | 1879 | 3   | 3  | 26.13  | 16 | 31122.0 | 31706 | 4.90 | 4.55 |
| Costomer subunit epsilon                                         | Q14579.3 | 2330 | 6   | 3  | 47.95  | 12 | 34482.2 | 33337 | 4.98 | 4.70 |
|                                                                  |          | 1866 | 89  | 13 | 244.52 | 63 | 34482.2 | 32979 | 4.98 | 4.70 |
|                                                                  |          | 1879 | 15  | 6  | 103.00 | 25 | 34482.2 | 31706 | 4.98 | 4.55 |
| Endoplasmic reticulum resident protein 29                        | P30040.4 | 2660 | 86  | 12 | 216.15 | 54 | 28993.6 | 28281 | 6.77 | 6.25 |
|                                                                  |          | 2053 | 15  | 4  | 67.15  | 18 | 28993.6 | 25530 | 6.77 | 5.85 |
|                                                                  |          | 2129 | 12  | 4  | 70.70  | 16 | 28993.6 | 24707 | 6.77 | 7.20 |
| Calpain small subunit 1                                          | P04632.1 | 2685 | 119 | 12 | 208.04 | 67 | 28315.9 | 25488 | 5.05 | 4.85 |
|                                                                  |          | 2110 | 187 | 12 | 219.51 | 69 | 28315.9 | 25816 | 5.05 | 4.75 |
| UPF0568 protein C14                                              | Q9Y224.1 | 2752 | 115 | 14 | 256.37 | 64 | 28068.2 | 25488 | 6.19 | 6.60 |
|                                                                  |          | 2093 | 33  | 7  | 127.70 | 33 | 28068.2 | 25816 | 6.19 | 6.60 |
| Hypoxanthine-guanine phosphoribosyltransferase                   | P00492.2 | 2752 | 88  | 12 | 233.31 | 76 | 24579.5 | 25488 | 6.21 | 6.60 |
|                                                                  |          | 2093 | 46  | 7  | 138.71 | 40 | 24579.5 | 25816 | 6.21 | 6.60 |
| Thioredoxin-dependent peroxide reductase, mitochondrial          | P30048.3 | 2880 | 14  | 6  | 99.76  | 24 | 27692.8 | 23520 | 7.67 | 5.45 |
|                                                                  |          | 2910 | 32  | 5  | 91.91  | 21 | 27692.8 | 23520 | 7.67 | 6.30 |
|                                                                  |          | 2192 | 29  | 5  | 87.85  | 19 | 27692.8 | 22746 | 7.67 | 6.40 |

TABLE S2: 2-CIDyA-tagged proteins identified by LC-MS/MS after 1-D SDS-PAGE of enriched membrane fractions

| Protein name                                | UniProt accession number | Spot                                                | Spectra  | Distinct peptides | Distinct summed MS/MS search score | % AA coverage | Molecular mass (Da) | Molecular mass exper. (Da) | pI       | Membrane fraction   |                     |                     |  |  |
|---------------------------------------------|--------------------------|-----------------------------------------------------|----------|-------------------|------------------------------------|---------------|---------------------|----------------------------|----------|---------------------|---------------------|---------------------|--|--|
|                                             |                          |                                                     |          |                   |                                    |               |                     |                            |          | Membrane fraction 1 | Membrane fraction 2 | Membrane fraction 3 |  |  |
| Myosin-9                                    | P35579.4                 | 1                                                   | 398      | 70                | 1214.76                            | 43            | 226533.4            | 914650                     | 5.50     |                     |                     |                     |  |  |
|                                             |                          | 2                                                   | 1683     | 107               | 2011.10                            | 54            | 226533.4            | 400760                     | 5.50     |                     |                     |                     |  |  |
|                                             |                          | 4                                                   | 378      | 66                | 1157.98                            | 43            | 226533.4            | 94950                      | 5.50     |                     |                     |                     |  |  |
|                                             |                          | 1                                                   | 32       | 15                | 254.80                             | 11            | 226533.4            | 914650                     | 5.80     |                     |                     |                     |  |  |
|                                             |                          | 2                                                   | 198      | 67                | 1048.30                            | 42            | 226533.4            | 400760                     | 5.80     |                     |                     |                     |  |  |
|                                             |                          | 3                                                   | 1133     | 120               | 2196.93                            | 57            | 226533.4            | 264190                     | 5.80     |                     |                     |                     |  |  |
|                                             |                          | 4                                                   | 66       | 30                | 445.19                             | 18            | 226533.4            | 94950                      | 5.80     |                     |                     |                     |  |  |
|                                             |                          | 1                                                   | 231      | 63                | 1035.85                            | 38            | 226533.4            | 914650                     | 5.80     |                     |                     |                     |  |  |
|                                             |                          | 2                                                   | 209      | 57                | 909.08                             | 34            | 226533.4            | 400760                     | 5.80     |                     |                     |                     |  |  |
|                                             |                          | 3                                                   | 910      | 102               | 1914.32                            | 52            | 226533.4            | 264190                     | 5.80     |                     |                     |                     |  |  |
|                                             |                          | 4                                                   | 46       | 17                | 270.09                             | 10            | 226533.4            | 94950                      | 5.80     |                     |                     |                     |  |  |
|                                             |                          | Neuroblast differentiation-associated protein AHNAK | Q09666.2 | 1                 | 139                                | 24            | 355.54              | 4                          | 629104.8 | 914650              | 5.80                |                     |  |  |
| 2                                           | 92                       |                                                     |          | 29                | 436.77                             | 6             | 629104.8            | 400760                     | 5.80     |                     |                     |                     |  |  |
| 2                                           | 198                      |                                                     |          | 70                | 1054.75                            | 15            | 629104.8            | 400760                     | 5.80     |                     |                     |                     |  |  |
| POTE ankyrin domain family member F         | A5A3E0.2                 | 1                                                   | 23       | 4                 | 68.00                              | 4             | 121445.5            | 914650                     | 5.83     |                     |                     |                     |  |  |
|                                             |                          | 2                                                   | 5        | 4                 | 62.32                              | 4             | 121445.3            | 400760                     | 5.83     |                     |                     |                     |  |  |
|                                             |                          | 2                                                   | 6        | 3                 | 49.67                              | 3             | 121445.3            | 400760                     | 5.83     |                     |                     |                     |  |  |
| Fibronectin                                 | P02751.4                 | 4                                                   | 38       | 12                | 163.92                             | 6             | 262625.9            | 94950                      | 5.46     |                     |                     |                     |  |  |
|                                             |                          | 2                                                   | 40       | 18                | 274.33                             | 10            | 262625.9            | 400760                     | 5.46     |                     |                     |                     |  |  |
|                                             |                          | 2                                                   | 65       | 22                | 351.90                             | 13            | 262625.9            | 400760                     | 5.46     |                     |                     |                     |  |  |
| Integrin beta-1                             | P05556.2                 | 5                                                   | 29       | 8                 | 120.64                             | 11            | 88415.9             | 86920                      | 5.27     |                     |                     |                     |  |  |
|                                             |                          | 4                                                   | 41       | 14                | 211.43                             | 22            | 88415.9             | 94950                      | 5.27     |                     |                     |                     |  |  |
|                                             |                          | 4                                                   | 38       | 11                | 175.95                             | 20            | 88415.9             | 94950                      | 5.27     |                     |                     |                     |  |  |
|                                             |                          | 5                                                   | 25       | 11                | 160.71                             | 16            | 88415.9             | 86920                      | 5.27     |                     |                     |                     |  |  |
|                                             |                          | 6                                                   | 432      | 28                | 534.37                             | 47            | 72333.3             | 68990                      | 5.07     |                     |                     |                     |  |  |
| 78 kDa glucose-regulated protein P11021.2   | P11021.2                 | 6                                                   | 208      | 29                | 510.72                             | 48            | 72333.3             | 68990                      | 5.07     |                     |                     |                     |  |  |
|                                             |                          | 6                                                   | 253      | 35                | 632.20                             | 50            | 72333.3             | 68990                      | 5.07     |                     |                     |                     |  |  |
|                                             |                          | 6                                                   | 290      | 29                | 494.97                             | 53            | 75520.7             | 68990                      | 5.60     |                     |                     |                     |  |  |
| Interferon-induced GTP-binding protein Mx1  | P20591.4                 | 6                                                   | 142      | 30                | 477.23                             | 56            | 75520.7             | 68990                      | 5.60     |                     |                     |                     |  |  |
|                                             |                          | 6                                                   | 221      | 34                | 594.56                             | 59            | 75520.7             | 68990                      | 5.60     |                     |                     |                     |  |  |
|                                             |                          | 6                                                   | 114      | 21                | 335.79                             | 40            | 72932.8             | 68990                      | 4.96     |                     |                     |                     |  |  |
| Protein disulfide-isomerase A4              | P13667.2                 | 6                                                   | 27       | 10                | 152.85                             | 19            | 72932.8             | 68990                      | 4.96     |                     |                     |                     |  |  |
|                                             |                          | 6                                                   | 52       | 17                | 235.16                             | 30            | 72932.8             | 68990                      | 4.96     |                     |                     |                     |  |  |
|                                             |                          | 6                                                   | 69       | 15                | 231.26                             | 25            | 67820.4             | 68990                      | 6.07     |                     |                     |                     |  |  |
| Moesin                                      | P26038.3                 | 6                                                   | 36       | 17                | 233.01                             | 32            | 67820.4             | 68990                      | 6.07     |                     |                     |                     |  |  |
|                                             |                          | 6                                                   | 31       | 9                 | 136.60                             | 17            | 67820.4             | 68990                      | 6.07     |                     |                     |                     |  |  |
|                                             |                          | 6                                                   | 83       | 12                | 167.97                             | 24            | 65401.8             | 68990                      | 9.05     |                     |                     |                     |  |  |
| Septin-9                                    | Q9UHD8.2                 | 6                                                   | 34       | 11                | 165.36                             | 26            | 65401.8             | 68990                      | 9.05     |                     |                     |                     |  |  |
|                                             |                          | 6                                                   | 33       | 11                | 168.67                             | 22            | 65401.8             | 68990                      | 9.05     |                     |                     |                     |  |  |
|                                             |                          | 6                                                   | 34       | 9                 | 130.82                             | 14            | 73243.8             | 68990                      | 6.73     |                     |                     |                     |  |  |
| ATP-dependent RNA helicase DDX3X            | O00571.3                 | 6                                                   | 15       | 7                 | 109.53                             | 12            | 73243.8             | 68990                      | 6.73     |                     |                     |                     |  |  |
|                                             |                          | 6                                                   | 26       | 13                | 195.74                             | 22            | 73243.8             | 68990                      | 6.73     |                     |                     |                     |  |  |
|                                             |                          | 8                                                   | 288      | 38                | 651.07                             | 69            | 53651.9             | 52900                      | 5.06     |                     |                     |                     |  |  |
| Vimentin                                    | P08670.4                 | 10                                                  | 39       | 15                | 235.16                             | 34            | 53651.9             | 49970                      | 5.06     |                     |                     |                     |  |  |
|                                             |                          | 11                                                  | 16       | 8                 | 108.47                             | 17            | 53651.9             | 48820                      | 5.06     |                     |                     |                     |  |  |
|                                             |                          | 8                                                   | 354      | 39                | 684.76                             | 72            | 53651.9             | 52900                      | 5.06     |                     |                     |                     |  |  |
|                                             |                          | 9                                                   | 26       | 11                | 169.24                             | 25            | 53651.9             | 51180                      | 5.06     |                     |                     |                     |  |  |
|                                             |                          | 10                                                  | 42       | 18                | 283.12                             | 41            | 53651.9             | 49970                      | 5.06     |                     |                     |                     |  |  |
|                                             |                          | 11                                                  | 24       | 11                | 177.01                             | 24            | 53651.9             | 48820                      | 5.06     |                     |                     |                     |  |  |
|                                             |                          | 8                                                   | 327      | 41                | 693.41                             | 72            | 53651.9             | 52900                      | 5.06     |                     |                     |                     |  |  |
|                                             |                          | 10                                                  | 39       | 13                | 208.92                             | 29            | 53651.9             | 49970                      | 5.06     |                     |                     |                     |  |  |
|                                             |                          | 11                                                  | 19       | 9                 | 132.69                             | 20            | 53651.9             | 48820                      | 5.06     |                     |                     |                     |  |  |
|                                             |                          | Protein disulfide-isomerase A3                      | P30101.4 | 8                 | 98                                 | 20            | 352.14              | 49                         | 56762.7  | 52900               | 5.99                |                     |  |  |
|                                             |                          |                                                     |          | 8                 | 67                                 | 18            | 307.66              | 46                         | 56762.7  | 52900               | 5.99                |                     |  |  |
|                                             |                          |                                                     |          | 8                 | 204                                | 26            | 457.47              | 60                         | 56762.7  | 52900               | 5.99                |                     |  |  |
| Tubulin beta-4B chain                       | P68371.1                 | 8                                                   | 32       | 11                | 192.63                             | 34            | 49831.3             | 52900                      | 4.79     |                     |                     |                     |  |  |
|                                             |                          | 9                                                   | 128      | 16                | 300.92                             | 47            | 49831.3             | 51180                      | 4.79     |                     |                     |                     |  |  |
|                                             |                          | 10                                                  | 69       | 15                | 275.67                             | 44            | 49831.3             | 49970                      | 4.79     |                     |                     |                     |  |  |
|                                             |                          | 11                                                  | 57       | 13                | 224.36                             | 37            | 49831.3             | 48820                      | 4.79     |                     |                     |                     |  |  |
|                                             |                          | 9                                                   | 41       | 12                | 199.43                             | 43            | 49831.3             | 51180                      | 4.79     |                     |                     |                     |  |  |
|                                             |                          | 10                                                  | 90       | 18                | 312.40                             | 53            | 49831.3             | 49970                      | 4.79     |                     |                     |                     |  |  |
|                                             |                          | 11                                                  | 84       | 17                | 297.35                             | 55            | 49831.3             | 48820                      | 4.79     |                     |                     |                     |  |  |
|                                             |                          | 8                                                   | 58       | 13                | 222.68                             | 39            | 49831.3             | 52900                      | 4.79     |                     |                     |                     |  |  |
|                                             |                          | 9                                                   | 124      | 17                | 298.12                             | 55            | 49831.3             | 51180                      | 4.79     |                     |                     |                     |  |  |
|                                             |                          | 10                                                  | 73       | 14                | 222.58                             | 40            | 49831.3             | 49970                      | 4.79     |                     |                     |                     |  |  |
|                                             |                          | Polypyrimidine tract-binding protein 1              | P26599.1 | 8                 | 30                                 | 8             | 141.32              | 30                         | 57221.6  | 52900               | 9.22                |                     |  |  |
| 8                                           | 28                       |                                                     |          | 6                 | 105.16                             | 19            | 57221.6             | 52900                      | 9.22     |                     |                     |                     |  |  |
| 8                                           | 45                       |                                                     |          | 6                 | 108.53                             | 21            | 57221.6             | 52900                      | 9.22     |                     |                     |                     |  |  |
| Brain acid soluble protein 1                | P80723.2                 | 8                                                   | 24       | 7                 | 111.02                             | 57            | 22693.5             | 52900                      | 4.64     |                     |                     |                     |  |  |
|                                             |                          | 8                                                   | 22       | 6                 | 108.25                             | 51            | 22693.5             | 52900                      | 4.64     |                     |                     |                     |  |  |
|                                             |                          | 8                                                   | 19       | 5                 | 95.10                              | 37            | 22693.5             | 52900                      | 4.64     |                     |                     |                     |  |  |
| Dihydropyridyl dehydrogenase, mitochondrial | P09622.2                 | 8                                                   | 9        | 4                 | 77.75                              | 11            | 54177.6             | 52900                      | 7.95     |                     |                     |                     |  |  |
|                                             |                          | 8                                                   | 7        | 4                 | 65.65                              | 10            | 54177.6             | 52900                      | 7.95     |                     |                     |                     |  |  |
|                                             |                          | 8                                                   | 12       | 6                 | 101.01                             | 14            | 54177.6             | 52900                      | 7.95     |                     |                     |                     |  |  |
| Tubulin alpha-1C chain                      | Q9BQE3.1                 | 9                                                   | 38       | 9                 | 147.61                             | 29            | 49895.6             | 51180                      | 4.96     |                     |                     |                     |  |  |
|                                             |                          | 10                                                  | 63       | 13                | 234.10                             | 42            | 49895.6             | 49970                      | 4.96     |                     |                     |                     |  |  |
|                                             |                          | 11                                                  | 90       | 16                | 267.54                             | 51            | 49895.6             | 48820                      | 4.96     |                     |                     |                     |  |  |
|                                             |                          | 10                                                  | 68       | 14                | 258.00                             | 43            | 49895.6             | 49970                      | 4.96     |                     |                     |                     |  |  |
|                                             |                          | 11                                                  | 123      | 19                | 344.34                             | 60            | 49895.6             | 48820                      | 4.96     |                     |                     |                     |  |  |
|                                             |                          | 9                                                   | 75       | 11                | 205.97                             | 36            | 49895.6             | 51180                      | 4.96     |                     |                     |                     |  |  |
|                                             |                          | 10                                                  | 96       | 14                | 253.72                             | 46            | 49895.6             | 49970                      | 4.96     |                     |                     |                     |  |  |

|                                                                                                                 |          |  |    |     |    |        |    |         |       |       |
|-----------------------------------------------------------------------------------------------------------------|----------|--|----|-----|----|--------|----|---------|-------|-------|
|                                                                                                                 |          |  | 11 | 119 | 16 | 291.94 | 48 | 49895.6 | 48820 | 4.96  |
| Polymerase I and transcript release factor                                                                      | Q6NZI2.1 |  | 9  | 31  | 8  | 147.21 | 24 | 43476.3 | 51180 | 5.51  |
|                                                                                                                 |          |  | 8  | 13  | 4  | 69.32  | 12 | 43476.3 | 52900 | 5.51  |
|                                                                                                                 |          |  | 8  | 35  | 7  | 128.91 | 18 | 43476.3 | 52900 | 5.51  |
|                                                                                                                 |          |  | 9  | 15  | 5  | 82.12  | 15 | 43476.3 | 51180 | 5.51  |
| Dihydrolipoylysine-residue succinyltransferase component of 2-oxoglutarate dehydrogenase complex, mitochondrial | P36957.4 |  | 10 | 24  | 8  | 132.25 | 20 | 48755.6 | 49970 | 9.10  |
|                                                                                                                 |          |  | 10 | 22  | 7  | 122.44 | 18 | 48755.6 | 49970 | 9.10  |
|                                                                                                                 |          |  | 9  | 9   | 3  | 55.77  | 10 | 48755.6 | 51180 | 9.10  |
|                                                                                                                 |          |  | 10 | 20  | 6  | 90.50  | 16 | 48755.6 | 49970 | 9.10  |
| Heterogeneous nuclear ribonucleoprotein H                                                                       | P31943.4 |  | 10 | 5   | 3  | 48.38  | 8  | 49229.7 | 49970 | 5.89  |
|                                                                                                                 |          |  | 11 | 7   | 4  | 63.22  | 11 | 49229.7 | 48820 | 5.89  |
|                                                                                                                 |          |  | 10 | 15  | 6  | 102.83 | 17 | 49229.7 | 49970 | 5.89  |
|                                                                                                                 |          |  | 11 | 10  | 6  | 92.50  | 17 | 49229.7 | 48820 | 5.89  |
|                                                                                                                 |          |  | 10 | 31  | 8  | 123.23 | 23 | 49229.7 | 49970 | 5.89  |
|                                                                                                                 |          |  | 11 | 4   | 3  | 40.43  | 8  | 49229.7 | 48820 | 5.89  |
| PDZ and LIM domain protein 7                                                                                    | Q9NR12.1 |  | 10 | 7   | 3  | 39.40  | 7  | 49845.0 | 49970 | 8.76  |
|                                                                                                                 |          |  | 10 | 6   | 3  | 37.82  | 7  | 49845.0 | 49970 | 8.76  |
|                                                                                                                 |          |  | 9  | 6   | 3  | 40.53  | 7  | 49845.0 | 51180 | 8.76  |
| RuvB-like 1                                                                                                     | Q9Y265.1 |  | 11 | 4   | 4  | 62.15  | 10 | 50228.3 | 48820 | 6.02  |
|                                                                                                                 |          |  | 10 | 6   | 4  | 57.95  | 13 | 50228.3 | 49970 | 6.02  |
|                                                                                                                 |          |  | 10 | 26  | 9  | 154.27 | 28 | 50228.3 | 49970 | 6.02  |
| Rho GTPase-activating protein 1                                                                                 | Q07960.1 |  | 11 | 8   | 3  | 58.85  | 10 | 50436.0 | 48820 | 5.85  |
|                                                                                                                 |          |  | 10 | 6   | 3  | 59.11  | 10 | 50436.0 | 49970 | 5.85  |
|                                                                                                                 |          |  | 11 | 11  | 6  | 93.88  | 21 | 50436.0 | 48820 | 5.85  |
|                                                                                                                 |          |  | 10 | 9   | 5  | 76.82  | 17 | 50436.0 | 49970 | 5.85  |
|                                                                                                                 |          |  | 11 | 12  | 6  | 87.33  | 19 | 50436.0 | 48820 | 5.85  |
| Protein disulfide-isomerase A6                                                                                  | Q15084.1 |  | 11 | 6   | 3  | 53.12  | 10 | 48121.6 | 48820 | 4.95  |
|                                                                                                                 |          |  | 11 | 27  | 8  | 145.11 | 26 | 48121.6 | 48820 | 4.95  |
|                                                                                                                 |          |  | 11 | 47  | 10 | 186.18 | 31 | 48121.6 | 48820 | 4.95  |
| Cytochrome b-c1 complex subunit 2, mitochondrial                                                                | P22695.3 |  | 12 | 44  | 9  | 162.49 | 27 | 48443.2 | 43860 | 8.74  |
|                                                                                                                 |          |  | 12 | 39  | 10 | 187.40 | 29 | 48443.2 | 43860 | 8.74  |
|                                                                                                                 |          |  | 12 | 53  | 11 | 201.10 | 32 | 48443.2 | 43860 | 8.74  |
| HLA class I histocompatibility antigen, A-11 alpha chain                                                        | P13746.1 |  | 12 | 13  | 6  | 102.16 | 22 | 40937.0 | 43860 | 5.77  |
|                                                                                                                 |          |  | 13 | 15  | 8  | 125.42 | 29 | 40937.0 | 42830 | 5.77  |
|                                                                                                                 |          |  | 13 | 21  | 9  | 146.68 | 30 | 40937.0 | 42830 | 5.77  |
|                                                                                                                 |          |  | 13 | 42  | 11 | 197.70 | 41 | 40937.0 | 42830 | 5.77  |
| Interleukin enhancer-binding factor 2                                                                           | Q12905.2 |  | 12 | 9   | 5  | 85.87  | 18 | 43062.4 | 43860 | 5.19  |
|                                                                                                                 |          |  | 13 | 5   | 3  | 51.70  | 8  | 43062.4 | 42830 | 5.19  |
|                                                                                                                 |          |  | 12 | 8   | 5  | 79.40  | 18 | 43062.4 | 43860 | 5.19  |
|                                                                                                                 |          |  | 13 | 11  | 6  | 104.59 | 24 | 43062.4 | 42830 | 5.19  |
|                                                                                                                 |          |  | 12 | 16  | 6  | 99.00  | 21 | 43062.4 | 43860 | 5.19  |
|                                                                                                                 |          |  | 13 | 9   | 5  | 81.84  | 16 | 43062.4 | 42830 | 5.19  |
| Endoplasmic reticulum resident protein 44                                                                       | Q9BS26.1 |  | 12 | 17  | 5  | 66.29  | 12 | 46971.4 | 43860 | 5.09  |
|                                                                                                                 |          |  | 12 | 14  | 3  | 44.10  | 8  | 46971.4 | 43860 | 5.09  |
|                                                                                                                 |          |  | 12 | 12  | 3  | 46.50  | 8  | 46971.4 | 43860 | 5.09  |
| Guanine nucleotide-binding protein subunit alpha-11                                                             | P29992.2 |  | 14 | 10  | 5  | 61.32  | 18 | 42123.6 | 37370 | 5.51  |
|                                                                                                                 |          |  | 14 | 23  | 8  | 121.69 | 27 | 42123.6 | 37370 | 5.51  |
|                                                                                                                 |          |  | 14 | 43  | 13 | 200.61 | 43 | 42123.6 | 37370 | 5.51  |
| Glyceraldehyde-3-phosphate dehydrogenase                                                                        | P04406.3 |  | 15 | 52  | 12 | 183.30 | 47 | 36053.4 | 35120 | 8.57  |
|                                                                                                                 |          |  | 15 | 117 | 15 | 259.28 | 54 | 36053.4 | 35120 | 8.57  |
|                                                                                                                 |          |  | 15 | 131 | 16 | 256.32 | 59 | 36053.4 | 35120 | 8.57  |
| Annexin A2                                                                                                      | P07355.2 |  | 15 | 25  | 10 | 165.00 | 39 | 38604.2 | 35120 | 7.58  |
|                                                                                                                 |          |  | 16 | 275 | 28 | 530.89 | 72 | 38604.2 | 33810 | 7.58  |
|                                                                                                                 |          |  | 15 | 43  | 12 | 181.16 | 43 | 38604.2 | 35120 | 7.58  |
|                                                                                                                 |          |  | 16 | 319 | 26 | 487.14 | 70 | 38604.2 | 33810 | 7.58  |
|                                                                                                                 |          |  | 15 | 80  | 15 | 248.43 | 58 | 38604.2 | 35120 | 7.58  |
|                                                                                                                 |          |  | 16 | 310 | 24 | 450.39 | 71 | 38604.2 | 33810 | 7.58  |
| Annexin A1                                                                                                      | P04063.2 |  | 15 | 20  | 8  | 130.64 | 30 | 38714.5 | 35120 | 6.57  |
|                                                                                                                 |          |  | 15 | 44  | 16 | 256.35 | 58 | 38714.5 | 35120 | 6.57  |
|                                                                                                                 |          |  | 15 | 65  | 18 | 286.99 | 63 | 38714.5 | 35120 | 6.57  |
| Fructose-bisphosphate aldolase A                                                                                | P04075.2 |  | 15 | 16  | 6  | 103.40 | 21 | 39420.2 | 35120 | 8.30  |
|                                                                                                                 |          |  | 14 | 15  | 5  | 84.87  | 20 | 39420.2 | 37370 | 8.30  |
|                                                                                                                 |          |  | 15 | 23  | 8  | 117.51 | 31 | 39420.2 | 35120 | 8.30  |
|                                                                                                                 |          |  | 14 | 7   | 3  | 42.45  | 10 | 39420.2 | 37370 | 8.30  |
|                                                                                                                 |          |  | 15 | 28  | 8  | 134.30 | 33 | 39420.2 | 35120 | 8.30  |
| Heterogeneous nuclear ribonucleoproteins A2/B1                                                                  | P22626.2 |  | 15 | 14  | 5  | 70.56  | 16 | 37429.9 | 35120 | 8.97  |
|                                                                                                                 |          |  | 15 | 27  | 10 | 145.91 | 31 | 37429.9 | 35120 | 8.97  |
|                                                                                                                 |          |  | 16 | 15  | 5  | 80.89  | 17 | 37429.9 | 33810 | 8.97  |
|                                                                                                                 |          |  | 14 | 5   | 3  | 39.56  | 10 | 37429.9 | 37370 | 8.97  |
|                                                                                                                 |          |  | 15 | 39  | 9  | 138.51 | 28 | 37429.9 | 35120 | 8.97  |
|                                                                                                                 |          |  | 16 | 44  | 8  | 120.54 | 24 | 37429.9 | 33810 | 8.97  |
| Apolipoprotein L2                                                                                               | Q9BQE5.1 |  | 15 | 10  | 3  | 51.38  | 9  | 37092.5 | 35120 | 6.28  |
|                                                                                                                 |          |  | 15 | 12  | 3  | 56.88  | 9  | 37092.5 | 35120 | 6.28  |
|                                                                                                                 |          |  | 15 | 21  | 6  | 113.64 | 22 | 37092.5 | 35120 | 6.28  |
| RNA-binding protein Raly                                                                                        | Q9UKM9.1 |  | 15 | 5   | 3  | 48.70  | 9  | 32463.3 | 35120 | 9.20  |
|                                                                                                                 |          |  | 15 | 6   | 3  | 51.29  | 9  | 32463.3 | 35120 | 9.20  |
|                                                                                                                 |          |  | 15 | 12  | 5  | 79.93  | 15 | 32463.3 | 35120 | 9.20  |
| 60S acidic ribosomal protein P0                                                                                 | P05388.1 |  | 16 | 28  | 6  | 115.22 | 24 | 34273.7 | 33810 | 5.72  |
|                                                                                                                 |          |  | 16 | 51  | 9  | 149.54 | 32 | 34273.7 | 33810 | 5.72  |
|                                                                                                                 |          |  | 16 | 34  | 8  | 129.94 | 30 | 34273.7 | 33810 | 5.72  |
| 60S ribosomal protein L6                                                                                        | Q02878.3 |  | 16 | 26  | 7  | 111.81 | 25 | 32728.1 | 33810 | 10.59 |
|                                                                                                                 |          |  | 16 | 55  | 11 | 178.20 | 37 | 32728.1 | 33810 | 10.59 |
|                                                                                                                 |          |  | 16 | 99  | 13 | 233.35 | 44 | 32728.1 | 33810 | 10.59 |
| Syntaxin-12                                                                                                     | Q86Y82.1 |  | 16 | 7   | 3  | 47.00  | 13 | 31642.1 | 33810 | 5.46  |
|                                                                                                                 |          |  | 16 | 13  | 5  | 70.78  | 23 | 31642.1 | 33810 | 5.46  |
|                                                                                                                 |          |  | 16 | 22  | 5  | 89.22  | 23 | 31642.1 | 33810 | 5.46  |

|                                                         |          |    |    |    |        |    |         |       |       |
|---------------------------------------------------------|----------|----|----|----|--------|----|---------|-------|-------|
| Voltage-dependent anion-selective channel protein 1     | P21796.2 | 17 | 66 | 15 | 264.46 | 76 | 30772.7 | 31820 | 8.62  |
|                                                         |          | 17 | 54 | 9  | 159.43 | 48 | 30772.7 | 31820 | 8.62  |
|                                                         |          | 16 | 7  | 4  | 56.76  | 22 | 30772.7 | 33810 | 8.62  |
|                                                         |          | 17 | 67 | 13 | 220.79 | 68 | 30772.7 | 31820 | 8.62  |
| Prohibitin-2                                            | Q99623.2 | 17 | 52 | 12 | 212.93 | 44 | 33296.5 | 31820 | 9.83  |
|                                                         |          | 17 | 58 | 14 | 226.69 | 53 | 33296.5 | 31820 | 9.83  |
|                                                         |          | 16 | 8  | 4  | 59.25  | 14 | 33296.5 | 33810 | 9.83  |
|                                                         |          | 17 | 47 | 12 | 195.83 | 44 | 33296.5 | 31820 | 9.83  |
| Leucine-rich repeat-containing protein 59               | Q96AG4.1 | 17 | 41 | 9  | 154.70 | 34 | 34930.6 | 31820 | 9.61  |
|                                                         |          | 17 | 43 | 8  | 144.70 | 34 | 34930.6 | 31820 | 9.61  |
|                                                         |          | 17 | 57 | 11 | 183.94 | 39 | 34930.6 | 31820 | 9.61  |
| Malate dehydrogenase, mitochondrial                     | P40926.3 | 17 | 11 | 9  | 153.06 | 34 | 35503.5 | 31820 | 8.92  |
|                                                         |          | 16 | 6  | 3  | 52.57  | 13 | 35503.5 | 33810 | 8.92  |
|                                                         |          | 16 | 58 | 11 | 195.08 | 44 | 35503.5 | 33810 | 8.92  |
| NADH-cytochrome b5 reductase 3                          | P00387.3 | 17 | 26 | 8  | 137.64 | 30 | 34235.1 | 31820 | 7.18  |
|                                                         |          | 17 | 36 | 7  | 114.20 | 23 | 34235.1 | 31820 | 7.18  |
|                                                         |          | 17 | 27 | 7  | 120.45 | 23 | 34235.1 | 31820 | 7.18  |
| Voltage-dependent anion-selective channel protein 2     | P45880.2 | 17 | 19 | 6  | 104.33 | 27 | 31566.7 | 31820 | 7.50  |
|                                                         |          | 17 | 27 | 8  | 128.69 | 39 | 31566.7 | 31820 | 7.50  |
|                                                         |          | 16 | 8  | 3  | 39.44  | 13 | 31566.7 | 33810 | 7.50  |
|                                                         |          | 17 | 29 | 8  | 132.31 | 39 | 31566.7 | 31820 | 7.50  |
| ATP synthase subunit gamma, mitochondrial               | P36542.1 | 17 | 19 | 5  | 85.50  | 18 | 32996.2 | 31820 | 9.23  |
|                                                         |          | 17 | 47 | 9  | 144.05 | 31 | 32996.2 | 31820 | 9.23  |
|                                                         |          | 17 | 79 | 10 | 163.22 | 41 | 32996.2 | 31820 | 9.23  |
| ER membrane protein complex subunit 2                   | Q15006.1 | 17 | 13 | 4  | 55.04  | 12 | 34833.7 | 31820 | 6.15  |
|                                                         |          | 17 | 13 | 5  | 72.45  | 16 | 34833.7 | 31820 | 6.15  |
|                                                         |          | 17 | 12 | 5  | 78.06  | 17 | 34833.7 | 31820 | 6.15  |
| Annexin A3                                              | P12429.3 | 17 | 4  | 3  | 45.16  | 9  | 36375.5 | 31820 | 5.63  |
|                                                         |          | 17 | 5  | 4  | 41.69  | 10 | 36375.5 | 31820 | 5.63  |
|                                                         |          | 17 | 15 | 7  | 89.00  | 24 | 36375.5 | 31820 | 5.63  |
| 40S ribosomal protein S8                                | P62241.2 | 18 | 58 | 9  | 151.40 | 45 | 24205.3 | 25790 | 10.32 |
|                                                         |          | 18 | 64 | 11 | 189.96 | 58 | 24205.3 | 25790 | 10.32 |
|                                                         |          | 18 | 10 | 4  | 53.37  | 21 | 24205.3 | 25790 | 10.32 |
| Membrane-associated progesterone receptor component 2   | O15173.1 | 18 | 31 | 7  | 114.07 | 35 | 23818.6 | 25790 | 4.76  |
|                                                         |          | 18 | 36 | 9  | 133.56 | 34 | 23818.6 | 25790 | 4.76  |
|                                                         |          | 18 | 9  | 3  | 53.98  | 18 | 23818.6 | 25790 | 4.76  |
| 60S ribosomal protein L13                               | P26373.4 | 18 | 35 | 6  | 90.21  | 27 | 24261.6 | 25790 | 11.62 |
|                                                         |          | 18 | 41 | 6  | 97.03  | 24 | 24261.6 | 25790 | 11.62 |
|                                                         |          | 18 | 28 | 6  | 94.77  | 24 | 24261.6 | 25790 | 11.62 |
| Vesicle-trafficking protein SEC22b                      | O75396.4 | 19 | 34 | 6  | 117.50 | 34 | 24593.5 | 24780 | 6.44  |
|                                                         |          | 19 | 62 | 10 | 180.40 | 47 | 24593.5 | 24780 | 6.44  |
|                                                         |          | 19 | 36 | 7  | 134.51 | 43 | 24593.5 | 24780 | 6.44  |
| Ras-related protein Rab-6A                              | P20340.3 | 19 | 17 | 7  | 104.28 | 34 | 23592.9 | 24780 | 5.42  |
|                                                         |          | 19 | 41 | 10 | 169.89 | 53 | 23592.9 | 24780 | 5.42  |
|                                                         |          | 19 | 28 | 9  | 140.37 | 48 | 23592.9 | 24780 | 5.42  |
| Ras-related protein Rab-11B                             | Q15907.4 | 19 | 21 | 6  | 97.09  | 27 | 24488.6 | 24780 | 5.65  |
|                                                         |          | 19 | 62 | 10 | 183.50 | 52 | 24488.6 | 24780 | 5.65  |
|                                                         |          | 19 | 74 | 11 | 204.72 | 56 | 24488.6 | 24780 | 5.65  |
| 60S ribosomal protein L14                               | P50914.4 | 19 | 19 | 5  | 90.46  | 24 | 23432.0 | 24780 | 10.94 |
|                                                         |          | 19 | 36 | 6  | 107.11 | 30 | 23432.0 | 24780 | 10.94 |
|                                                         |          | 19 | 16 | 4  | 72.03  | 22 | 23432.0 | 24780 | 10.94 |
| Ras-related protein Rab-7a                              | P51149.1 | 19 | 5  | 3  | 57.13  | 18 | 23489.9 | 24780 | 6.39  |
|                                                         |          | 19 | 29 | 8  | 144.52 | 46 | 23489.9 | 24780 | 6.39  |
|                                                         |          | 20 | 12 | 6  | 109.42 | 37 | 23489.9 | 24350 | 6.39  |
|                                                         |          | 19 | 62 | 13 | 241.42 | 66 | 23489.9 | 24780 | 6.39  |
|                                                         |          | 20 | 14 | 4  | 68.55  | 26 | 23489.9 | 24350 | 6.39  |
| Thioredoxin-dependent peroxide reductase, mitochondrial | P30048.3 | 19 | 7  | 3  | 49.81  | 14 | 27692.8 | 24780 | 7.67  |
|                                                         |          | 19 | 22 | 5  | 88.45  | 21 | 27692.8 | 24780 | 7.67  |
|                                                         |          | 19 | 30 | 6  | 105.36 | 24 | 27692.8 | 24780 | 7.67  |
| ATP synthase subunit O, mitochondrial                   | P48047.1 | 20 | 30 | 9  | 168.57 | 49 | 23277.4 | 24350 | 9.97  |
|                                                         |          | 20 | 69 | 11 | 200.19 | 66 | 23277.4 | 24350 | 9.97  |
|                                                         |          | 20 | 42 | 8  | 154.12 | 49 | 23277.4 | 24350 | 9.97  |
| Peroxisome protein 1                                    | Q06830.1 | 20 | 25 | 7  | 124.26 | 37 | 22110.5 | 24350 | 8.27  |
|                                                         |          | 20 | 60 | 11 | 183.00 | 47 | 22110.5 | 24350 | 8.27  |
|                                                         |          | 20 | 27 | 7  | 101.68 | 33 | 22110.5 | 24350 | 8.27  |
| GTP-binding protein SAR1a                               | Q9NR31.1 | 20 | 10 | 3  | 47.82  | 15 | 22366.9 | 24350 | 6.22  |
|                                                         |          | 20 | 10 | 4  | 70.96  | 27 | 22366.9 | 24350 | 6.22  |
|                                                         |          | 19 | 9  | 4  | 66.38  | 27 | 22366.9 | 24780 | 6.22  |
| ELAV-like protein 1                                     | Q15717.2 | 17 | 18 | 7  | 115.40 | 25 | 36092.1 | 31820 | 9.23  |
|                                                         |          | 17 | 9  | 4  | 61.66  | 15 | 36092.1 | 31820 | 9.23  |
| Heat shock protein beta-1                               | P04792.2 | 18 | 54 | 13 | 198.91 | 63 | 22782.6 | 25790 | 5.98  |
|                                                         |          | 18 | 87 | 15 | 260.66 | 85 | 22782.6 | 25790 | 5.98  |
| B-cell receptor-associated protein 31                   | P51572.3 | 18 | 27 | 8  | 133.50 | 27 | 27991.8 | 25790 | 8.44  |
|                                                         |          | 18 | 41 | 9  | 152.29 | 30 | 27991.8 | 25790 | 8.44  |

|                                                                |          |    |    |    |        |    |          |        |       |
|----------------------------------------------------------------|----------|----|----|----|--------|----|----------|--------|-------|
| Proteasome subunit alpha type-7                                | O14818.1 | 18 | 8  | 5  | 79.62  | 23 | 27887.0  | 25790  | 8.60  |
|                                                                |          | 18 | 16 | 6  | 109.75 | 34 | 27887.0  | 25790  | 8.60  |
| Ras-related protein Raj-A                                      | P11233.1 | 18 | 16 | 4  | 74.46  | 22 | 23566.9  | 25790  | 6.66  |
|                                                                |          | 18 | 25 | 5  | 99.26  | 34 | 23566.9  | 25790  | 6.66  |
| Electron transfer flavoprotein subunit beta                    | P38117.3 | 18 | 8  | 5  | 64.82  | 23 | 27843.8  | 25790  | 8.25  |
|                                                                |          | 18 | 9  | 7  | 94.92  | 30 | 27843.8  | 25790  | 8.25  |
| Ras-related protein Rab-5B                                     | P61020.1 | 18 | 9  | 4  | 64.11  | 26 | 23706.9  | 25790  | 8.29  |
|                                                                |          | 18 | 8  | 4  | 66.87  | 20 | 23706.9  | 25790  | 8.29  |
| Calpain small subunit 1                                        | P04632.1 | 18 | 5  | 4  | 61.01  | 14 | 28315.9  | 25790  | 5.05  |
|                                                                |          | 18 | 11 | 6  | 95.20  | 25 | 28315.9  | 25790  | 5.05  |
| 60S ribosomal protein L7                                       | P18124.1 | 18 | 14 | 4  | 58.72  | 14 | 29225.9  | 25790  | 10.66 |
|                                                                |          | 18 | 32 | 9  | 131.26 | 43 | 29225.9  | 25790  | 10.66 |
| 3-hydroxyacyl-CoA dehydrogenase type-2                         | Q99714.3 | 19 | 70 | 14 | 260.26 | 78 | 26923.2  | 24780  | 7.65  |
|                                                                |          | 19 | 52 | 12 | 222.66 | 72 | 26923.2  | 24780  | 7.65  |
| Transgelin                                                     | Q01995.4 | 20 | 23 | 9  | 122.37 | 50 | 22611.0  | 24350  | 8.87  |
|                                                                |          | 20 | 34 | 12 | 178.75 | 69 | 22611.0  | 24350  | 8.87  |
| Thymidylate kinase                                             | P23919.4 | 20 | 15 | 4  | 70.30  | 19 | 23819.5  | 24350  | 8.40  |
|                                                                |          | 20 | 7  | 4  | 61.90  | 18 | 23819.5  | 24350  | 8.40  |
| Ras-related protein Rab-1B                                     | Q9H0U4.1 | 20 | 16 | 5  | 68.43  | 28 | 22171.3  | 24350  | 5.55  |
|                                                                |          | 20 | 23 | 5  | 75.97  | 28 | 22171.3  | 24350  | 5.55  |
| Sodium/potassium-transporting ATPase subunit alpha-1           | P05023.1 | 1  | 16 | 8  | 131.14 | 10 | 112896.8 | 914650 | 5.33  |
|                                                                |          | 1  | 28 | 9  | 148.64 | 11 | 112896.8 | 914650 | 5.33  |
| Alpha-actinin-4                                                | O43707.2 | 5  | 79 | 21 | 337.56 | 27 | 104854.6 | 86920  | 5.27  |
|                                                                |          | 5  | 86 | 30 | 455.31 | 39 | 104854.6 | 86920  | 5.27  |
| Dihydropyrimidinase-related protein 2                          | Q16555.1 | 7  | 23 | 8  | 126.01 | 18 | 62294.0  | 58910  | 5.95  |
|                                                                |          | 7  | 27 | 9  | 142.53 | 22 | 62294.0  | 58910  | 5.95  |
| Glucosylceramidase                                             | P04062.3 | 7  | 9  | 4  | 51.73  | 7  | 59716.6  | 58910  | 7.29  |
|                                                                |          | 7  | 4  | 3  | 36.64  | 5  | 59716.6  | 58910  | 7.29  |
| Paraspeckle component 1                                        | Q8WXF1.1 | 7  | 5  | 3  | 40.51  | 6  | 58743.9  | 58910  | 6.26  |
|                                                                |          | 7  | 8  | 4  | 62.28  | 7  | 58743.9  | 58910  | 6.26  |
| Calreticulin                                                   | P27797.1 | 8  | 5  | 3  | 43.32  | 13 | 48141.8  | 52900  | 4.29  |
|                                                                |          | 8  | 13 | 6  | 93.84  | 19 | 48141.8  | 52900  | 4.29  |
| Annexin A11                                                    | P50995.1 | 9  | 19 | 8  | 135.08 | 18 | 54390.0  | 51180  | 7.53  |
|                                                                |          | 9  | 33 | 13 | 208.33 | 27 | 54390.0  | 51180  | 7.53  |
| Cytosol aminopeptidase                                         | P28838.3 | 9  | 6  | 4  | 52.29  | 8  | 56166.7  | 51180  | 8.03  |
|                                                                |          | 9  | 23 | 8  | 111.53 | 19 | 56166.7  | 51180  | 8.03  |
| Inosine 5'-monophosphate dehydrogenase 2                       | P12268.2 | 9  | 7  | 3  | 47.98  | 7  | 55805.3  | 51180  | 6.44  |
|                                                                |          | 8  | 6  | 5  | 68.17  | 14 | 55805.3  | 52900  | 6.44  |
| HLA class I histocompatibility antigen, B-40 alpha chain       | Q04826.1 | 14 | 30 | 9  | 157.98 | 32 | 40505.4  | 37370  | 6.09  |
|                                                                |          | 12 | 21 | 8  | 145.40 | 26 | 40505.4  | 43860  | 6.09  |
| L-lactate dehydrogenase A chain                                | P00338.2 | 17 | 6  | 3  | 51.76  | 10 | 36688.9  | 31820  | 8.44  |
|                                                                |          | 17 | 11 | 7  | 92.76  | 25 | 36688.9  | 31820  | 8.44  |
| GTP:AMP phosphotransferase, mitochondrial                      | Q9UJ7.4  | 18 | 4  | 3  | 47.39  | 15 | 25565.5  | 25790  | 9.15  |
|                                                                |          | 18 | 12 | 5  | 87.69  | 25 | 25565.5  | 25790  | 9.15  |
| Cytochrome b-c1 complex subunit Rieske, mitochondrial          | P47985.2 | 19 | 21 | 7  | 98.86  | 24 | 29668.1  | 24780  | 8.55  |
|                                                                |          | 19 | 16 | 6  | 82.65  | 21 | 29668.1  | 25790  | 8.55  |
| 60S ribosomal protein L9                                       | P32969.1 | 20 | 13 | 3  | 42.20  | 18 | 21863.5  | 24350  | 9.96  |
|                                                                |          | 19 | 24 | 6  | 98.31  | 37 | 21863.5  | 24780  | 9.96  |
| Major vault protein                                            | Q14764.4 | 4  | 19 | 12 | 183.14 | 16 | 99327.3  | 94950  | 5.34  |
|                                                                |          | 4  | 14 | 7  | 104.73 | 13 | 99327.3  | 94950  | 5.34  |
| Tubulin beta-2B chain                                          | Q9BVA1.1 | 8  | 12 | 5  | 90.12  | 16 | 49953.4  | 52900  | 4.78  |
|                                                                |          | 11 | 58 | 14 | 228.79 | 39 | 49953.4  | 48820  | 4.78  |
| RNA-binding motif protein, X chromosome                        | P38159.3 | 13 | 10 | 5  | 62.80  | 16 | 42332.0  | 42830  | 10.06 |
|                                                                |          | 13 | 21 | 5  | 75.09  | 13 | 42332.0  | 42830  | 10.06 |
| HLA class I histocompatibility antigen, A-69 alpha chain       | P10316.2 | 14 | 48 | 12 | 207.62 | 43 | 40977.1  | 37370  | 6.42  |
|                                                                |          | 14 | 36 | 11 | 190.88 | 43 | 40977.1  | 37370  | 6.42  |
| Guanine nucleotide-binding protein G(i) subunit alpha-2        | P04899.3 | 14 | 22 | 9  | 157.24 | 37 | 40451.1  | 37370  | 5.34  |
|                                                                |          | 14 | 29 | 7  | 111.59 | 24 | 40451.1  | 37370  | 5.34  |
| Inhibitor of nuclear factor kappa-B kinase-interacting protein | Q70UQ0.1 | 14 | 5  | 4  | 68.20  | 11 | 39309.2  | 37370  | 9.21  |
|                                                                |          | 14 | 6  | 3  | 51.09  | 8  | 39309.2  | 37370  | 9.21  |
| Poly(rC)-binding protein 2                                     | Q15366.1 | 15 | 9  | 4  | 57.09  | 13 | 38580.3  | 35120  | 6.33  |
|                                                                |          | 15 | 16 | 5  | 75.45  | 16 | 38580.3  | 35120  | 6.33  |
| Replication factor C subunit 4                                 | P35249.2 | 15 | 6  | 5  | 53.86  | 17 | 39682.0  | 35120  | 8.26  |
|                                                                |          | 15 | 11 | 4  | 56.82  | 14 | 39682.0  | 35120  | 8.26  |
| Eukaryotic translation initiation factor 2 subunit 1           | P05198.3 | 15 | 6  | 3  | 37.46  | 8  | 36112.4  | 35120  | 5.02  |
|                                                                |          | 15 | 11 | 4  | 50.80  | 12 | 36112.4  | 35120  | 5.02  |
| ATP synthase subunit b, mitochondrial                          | P24539.2 | 19 | 27 | 8  | 131.52 | 36 | 28908.8  | 24780  | 9.37  |
|                                                                |          | 19 | 77 | 11 | 209.03 | 50 | 28908.8  | 24780  | 9.37  |
| Transmembrane emp24 domain-containing protein 9                | Q9BVK6.2 | 19 | 17 | 5  | 84.20  | 22 | 27277.5  | 24780  | 7.81  |



|                                                    |          |    |    |   |        |    |         |       |      |
|----------------------------------------------------|----------|----|----|---|--------|----|---------|-------|------|
|                                                    |          | 19 | 24 | 5 | 85.88  | 22 | 27277.5 | 24780 | 7.81 |
| Ras-related protein R-Ras                          | P10301.1 | 19 | 12 | 4 | 71.66  | 24 | 23480.6 | 24780 | 6.44 |
|                                                    |          | 19 | 15 | 5 | 86.53  | 33 | 23480.6 | 24780 | 6.44 |
| BAG family molecular chaperone regulator 2         | O95816.1 | 19 | 11 | 5 | 71.22  | 23 | 23772.1 | 24780 | 6.25 |
|                                                    |          | 19 | 27 | 8 | 114.28 | 31 | 23772.1 | 24780 | 6.25 |
| NADH dehydrogenase [ubiquinone] flavoprotein 2     | P19404.2 | 19 | 9  | 4 | 61.64  | 24 | 27391.7 | 24780 | 8.21 |
|                                                    |          | 19 | 14 | 4 | 75.46  | 24 | 27391.7 | 24780 | 8.21 |
| Proteasome subunit beta type-1                     | P20618.2 | 19 | 8  | 3 | 52.59  | 13 | 26489.5 | 24780 | 8.27 |
|                                                    |          | 19 | 11 | 4 | 70.07  | 19 | 26489.5 | 24780 | 8.27 |
| Caveolin-1                                         | Q03138.4 | 19 | 9  | 3 | 46.63  | 25 | 20471.7 | 24780 | 5.64 |
|                                                    |          | 20 | 16 | 6 | 88.89  | 41 | 20471.7 | 24350 | 5.64 |
|                                                    |          | 19 | 17 | 6 | 91.95  | 41 | 20471.7 | 24780 | 5.64 |
|                                                    |          | 20 | 20 | 8 | 111.23 | 46 | 20471.7 | 24350 | 5.64 |
| Proteasome subunit alpha type-2                    | P25787.2 | 19 | 4  | 3 | 43.30  | 17 | 25898.7 | 24780 | 6.91 |
|                                                    |          | 19 | 27 | 6 | 99.48  | 41 | 25898.7 | 24780 | 6.91 |
| Protein DJ-1                                       | Q99497.2 | 19 | 4  | 2 | 31.63  | 18 | 19891.2 | 24780 | 6.33 |
|                                                    |          | 19 | 8  | 2 | 35.78  | 18 | 19891.2 | 24780 | 6.33 |
| Ras-related protein Rap-1b-like protein            | A6NIZ1.1 | 20 | 19 | 7 | 107.40 | 36 | 20925.0 | 24350 | 5.37 |
|                                                    |          | 20 | 16 | 6 | 81.18  | 39 | 20925.0 | 24350 | 5.37 |
| Ras-related protein Rab-18                         | Q9NP72.1 | 20 | 9  | 6 | 104.42 | 34 | 22977.2 | 24350 | 5.11 |
|                                                    |          | 20 | 26 | 7 | 129.03 | 42 | 22977.2 | 24350 | 5.11 |
| Superoxide dismutase [Mn], mitochondrial           | P04179.2 | 20 | 16 | 6 | 89.29  | 33 | 24722.2 | 24350 | 8.34 |
|                                                    |          | 20 | 54 | 7 | 117.62 | 30 | 24722.2 | 24350 | 8.34 |
| Ras-related protein Rab-2A                         | P61019.1 | 20 | 14 | 5 | 86.03  | 32 | 23545.7 | 24350 | 6.08 |
|                                                    |          | 20 | 17 | 6 | 97.18  | 38 | 23545.7 | 24350 | 6.08 |
| 28S ribosomal protein S23, mitochondrial           | Q9Y3D9.2 | 20 | 11 | 5 | 82.34  | 32 | 21770.7 | 24350 | 8.94 |
|                                                    |          | 20 | 17 | 6 | 97.77  | 35 | 21770.7 | 24350 | 8.94 |
| Rho-related GTP-binding protein RhoC               | P08134.1 | 20 | 15 | 5 | 81.45  | 29 | 22006.5 | 24350 | 6.20 |
|                                                    |          | 19 | 4  | 3 | 49.01  | 18 | 22006.5 | 24780 | 6.20 |
|                                                    |          | 20 | 17 | 5 | 78.13  | 31 | 22006.5 | 24350 | 6.20 |
| Transgelin-2                                       | P37802.3 | 20 | 6  | 4 | 67.78  | 22 | 22391.6 | 24350 | 8.41 |
|                                                    |          | 20 | 11 | 4 | 65.62  | 20 | 22391.6 | 24350 | 8.41 |
| NADH dehydrogenase [ubiquinone] 1 beta subcomplex  | O96000.3 | 20 | 14 | 4 | 59.75  | 29 | 20776.8 | 24350 | 8.72 |
|                                                    |          | 19 | 7  | 3 | 49.50  | 20 | 20776.8 | 24780 | 8.72 |
|                                                    |          | 20 | 19 | 3 | 54.59  | 20 | 20776.8 | 24350 | 8.72 |
| NADH dehydrogenase [ubiquinone] 1 alpha subcomplex | Q9P032.1 | 20 | 10 | 4 | 57.43  | 22 | 20266.6 | 24350 | 8.85 |
|                                                    |          | 20 | 15 | 5 | 67.24  | 28 | 20266.6 | 24350 | 8.85 |
| Peptidyl-prolyl cis-trans isomerase FKBP11         | Q9NYL4.1 | 20 | 9  | 3 | 45.35  | 8  | 22180.5 | 24350 | 9.44 |
|                                                    |          | 20 | 9  | 3 | 46.62  | 14 | 22180.5 | 24350 | 9.44 |

TABLE S3: 2-CIHdYA-tagged proteins identified by LC-MS/MS after an azide-agarose pull-down

Pull-down 1  
 Pull-down 2  
 Pull-down 3

| Protein name                                        | UniProt accession number | Spectra | Distinct peptides | Distinct summed MS/MS search score | % AA coverage | Molecular mass (Da) | pI   | GO - Cellular component*  |
|-----------------------------------------------------|--------------------------|---------|-------------------|------------------------------------|---------------|---------------------|------|---------------------------|
| Annexin A2                                          | P07355.2                 | 106     | 16                | 270.39                             | 52            | 38604.2             | 7.58 | PM, End, N, LM            |
|                                                     |                          | 108     | 12                | 234.14                             | 49            | 38604.2             | 7.58 |                           |
|                                                     |                          | 74      | 9                 | 170.1                              | 33            | 38604.2             | 7.58 |                           |
| Tubulin beta-4B chain                               | P68371.1                 | 53      | 14                | 256.24                             | 44            | 49831.3             | 4.79 | Cyt, N                    |
|                                                     |                          | 42      | 12                | 210.86                             | 34            | 49831.3             | 4.79 |                           |
|                                                     |                          | 51      | 11                | 187.88                             | 27            | 49831.3             | 4.79 |                           |
| Transgelin-2                                        | P37802.3                 | 99      | 10                | 192.82                             | 59            | 22391.6             | 8.41 | EVE                       |
|                                                     |                          | 24      | 6                 | 106.15                             | 32            | 22391.6             | 8.41 |                           |
|                                                     |                          | 42      | 7                 | 123.13                             | 43            | 22391.6             | 8.41 |                           |
| Tubulin alpha-1C chain                              | Q9BQE3.1                 | 53      | 10                | 183.10                             | 30            | 49895.6             | 4.96 | Cyt, N                    |
|                                                     |                          | 96      | 11                | 202.58                             | 32            | 49895.6             | 4.96 |                           |
|                                                     |                          | 44      | 9                 | 169.46                             | 29            | 49895.6             | 4.96 |                           |
| Neuroblast differentiation-associated protein AHNAK | Q09666.2                 | 29      | 10                | 156.13                             | 1             | 629104.8            | 5.80 | Cyt, N, PM, LM            |
|                                                     |                          | 9       | 6                 | 72.70                              | 1             | 629104.8            | 5.80 |                           |
|                                                     |                          | 4       | 3                 | 37.90                              | 0             | 629104.8            | 5.80 |                           |
| Annexin A1                                          | P04083.2                 | 48      | 7                 | 130.62                             | 28            | 38714.5             | 6.57 | Cyt, N, End, PM           |
|                                                     |                          | 61      | 9                 | 169.71                             | 34            | 38714.5             | 6.57 |                           |
|                                                     |                          | 44      | 10                | 177.33                             | 36            | 38714.5             | 6.57 |                           |
| Polymerase I and transcript release factor          | Q6NZI2.1                 | 26      | 6                 | 118.21                             | 20            | 43476.3             | 5.51 | Cav, Cyt, N, Mito, PM, ER |
|                                                     |                          | 18      | 6                 | 112.97                             | 20            | 43476.3             | 5.51 |                           |
|                                                     |                          | 38      | 7                 | 132.46                             | 21            | 43476.3             | 5.51 |                           |
| Interferon-induced GTP-binding protein Mx1          | P20591.4                 | 28      | 4                 | 67.07                              | 9             | 75520.7             | 5.60 | Cyt, ER, N                |
|                                                     |                          | 24      | 5                 | 80.71                              | 11            | 75520.7             | 5.60 |                           |
|                                                     |                          | 26      | 5                 | 86.30                              | 11            | 75520.7             | 5.60 |                           |
| Lactoylglutathione lyase                            | Q04760.4                 | 20      | 4                 | 66.29                              | 23            | 20777.8             | 5.12 | Cyt                       |
|                                                     |                          | 20      | 3                 | 56.41                              | 20            | 20777.8             | 5.12 |                           |
|                                                     |                          | 19      | 2                 | 34.40                              | 9             | 20777.8             | 5.12 |                           |
| Annexin A3                                          | P12429.3                 | 12      | 3                 | 53.85                              | 11            | 36375.5             | 5.63 | Cyt, PM                   |
|                                                     |                          | 11      | 3                 | 48.07                              | 11            | 36375.5             | 5.63 |                           |
|                                                     |                          | 14      | 3                 | 50.91                              | 11            | 36375.5             | 5.63 |                           |
| POTE ankyrin domain family member F                 | A5A3E0.2                 | 13      | 3                 | 53.22                              | 3             | 121445.3            | 5.83 | Cyt                       |
|                                                     |                          | 9       | 3                 | 51.33                              | 3             | 121445.3            | 5.83 |                           |
|                                                     |                          | 11      | 3                 | 38.38                              | 3             | 121445.3            | 5.83 |                           |
| Protein DJ-1                                        | Q99497.2                 | 20      | 3                 | 49.44                              | 25            | 19891.2             | 6.33 | Cyt, N, Mito, PM          |

|                                          |                 |    |   |       |    |          |       |                  |
|------------------------------------------|-----------------|----|---|-------|----|----------|-------|------------------|
|                                          |                 | 22 | 3 | 52.44 | 28 | 19891.2  | 6.33  |                  |
|                                          |                 | 8  | 3 | 43.96 | 25 | 19891.2  | 6.33  |                  |
| <b>Alpha-actinin-4</b>                   | <b>O43707.2</b> | 5  | 3 | 46.95 | 3  | 104854.6 | 5.27  | Cyt, C, J, N     |
|                                          |                 | 2  | 2 | 23.64 | 2  | 104854.6 | 5.27  |                  |
|                                          |                 | 3  | 2 | 31.70 | 2  | 104854.6 | 5.27  |                  |
| <b>Histone H3.1t</b>                     | <b>Q16695.3</b> | 20 | 3 | 38.41 | 16 | 15508.3  | 11.13 | N                |
|                                          |                 | 28 | 3 | 39.53 | 16 | 15508.3  | 11.13 |                  |
|                                          |                 | 31 | 3 | 41.03 | 16 | 15508.3  | 11.13 |                  |
| <b>Protein S100-A11</b>                  | <b>P31949.2</b> | 25 | 2 | 37.37 | 23 | 11740.5  | 6.56  | Cyt, N           |
|                                          |                 | 22 | 3 | 52.56 | 34 | 11740.5  | 6.56  |                  |
|                                          |                 | 29 | 4 | 65.01 | 42 | 11740.5  | 6.56  |                  |
| <b>Serum albumin</b>                     | <b>P02768.2</b> | 17 | 2 | 35.50 | 3  | 69367.1  | 5.92  | EVE, N           |
|                                          |                 | 10 | 2 | 31.21 | 3  | 69367.1  | 5.92  |                  |
|                                          |                 | 20 | 2 | 33.37 | 3  | 69367.1  | 5.92  |                  |
| <b>Histone H2A type 3</b>                | <b>Q7L7L0.3</b> | 12 | 3 | 39.25 | 26 | 14121.5  | 11.05 | N                |
|                                          |                 | 16 | 3 | 46.54 | 26 | 14121.5  | 11.05 |                  |
|                                          |                 | 11 | 3 | 47.39 | 26 | 14121.5  | 11.05 |                  |
| <b>Protein S100-A6</b>                   | <b>P06703.1</b> | 16 | 2 | 34.53 | 16 | 10179.8  | 5.32  | Cyt, N, PM       |
|                                          |                 | 14 | 2 | 33.25 | 16 | 10179.8  | 5.32  |                  |
|                                          |                 | 5  | 2 | 34.45 | 16 | 10179.8  | 5.32  |                  |
| <b>Glutathione S-transferase omega-1</b> | <b>P78417.2</b> | 11 | 2 | 34.49 | 9  | 27566.0  | 6.24  | Cyt              |
|                                          |                 | 8  | 2 | 29.25 | 9  | 27566.0  | 6.24  |                  |
|                                          |                 | 7  | 2 | 32.15 | 9  | 27566.0  | 6.24  |                  |
| <b>Polyubiquitin-C</b>                   | <b>P0CG48.3</b> | 9  | 2 | 27.78 | 2  | 77039.0  | 7.16  | Cyt, N, End, PM  |
|                                          |                 | 9  | 2 | 36.27 | 2  | 77039.0  | 7.16  |                  |
|                                          |                 | 5  | 2 | 34.76 | 2  | 77039.0  | 7.16  |                  |
| <b>Galectin-1</b>                        | <b>P09382.2</b> | 10 | 3 | 58.14 | 26 | 14715.8  | 5.34  | Cyt              |
|                                          |                 | 7  | 2 | 35.84 | 17 | 14715.8  | 5.34  |                  |
|                                          |                 | 3  | 2 | 33.66 | 17 | 14715.8  | 5.34  |                  |
| <b>Perilipin-3</b>                       | <b>O60664.3</b> | 5  | 2 | 36.68 | 6  | 47075.2  | 5.30  | Cyt, GA, End     |
|                                          |                 | 5  | 2 | 34.63 | 6  | 47075.2  | 5.30  |                  |
|                                          |                 | 4  | 2 | 31.41 | 6  | 47075.2  | 5.30  |                  |
| <b>Elongation factor 1-alpha 2</b>       | <b>Q05639.1</b> | 11 | 2 | 32.66 | 4  | 50470.4  | 9.11  | N                |
|                                          |                 | 8  | 3 | 46.27 | 7  | 50470.4  | 9.11  |                  |
| <b>Cofilin-1</b>                         | <b>P23528.3</b> | 2  | 1 | 20.77 | 12 | 18502.6  | 8.22  | Cyt, N           |
|                                          |                 | 10 | 1 | 23.00 | 12 | 18502.6  | 8.22  |                  |
| <b>Brain acid soluble protein 1</b>      | <b>P80723.2</b> | 9  | 2 | 36.76 | 18 | 22693.5  | 4.64  | C, J, PM, Cyt, N |
|                                          |                 | 9  | 2 | 35.66 | 15 | 22693.5  | 4.64  |                  |
| <b>Histone H1.5</b>                      | <b>P16401.3</b> | 4  | 3 | 46.52 | 10 | 22580.3  | 10.91 | N                |
|                                          |                 | 13 | 3 | 45.84 | 16 | 22580.3  | 10.91 |                  |

|                                                      |          |   |   |       |    |          |       |                |
|------------------------------------------------------|----------|---|---|-------|----|----------|-------|----------------|
| Histone H1.3                                         | P16402.2 | 4 | 2 | 38.45 | 10 | 22350.0  | 11.02 | N              |
|                                                      |          | 7 | 2 | 32.66 | 10 | 22350.0  | 11.02 |                |
| Acetyl-CoA acetyltransferase, cytosolic              | Q9BWD1.2 | 9 | 2 | 41.43 | 12 | 41351.1  | 6.47  | Cyt, N         |
|                                                      |          | 9 | 4 | 67.77 | 22 | 41351.1  | 6.47  |                |
| Tumor protein D54                                    | O43399.2 | 6 | 2 | 34.95 | 14 | 22237.8  | 5.26  | Cyt            |
|                                                      |          | 7 | 3 | 48.98 | 21 | 22237.8  | 5.26  |                |
| Myosin-9                                             | P35579.4 | 6 | 4 | 62.07 | 2  | 226533.4 | 5.50  | Cyt, N, CJ, PM |
|                                                      |          | 7 | 2 | 43.32 | 1  | 226533.4 | 5.50  |                |
| Fibronectin                                          | P02751.4 | 7 | 2 | 40.53 | 1  | 262625.9 | 5.46  | ER, GA, EVE    |
|                                                      |          | 4 | 3 | 45.92 | 1  | 262625.9 | 5.46  |                |
| Sodium/potassium-transporting ATPase subunit alpha-1 | P05023.1 | 3 | 2 | 31.79 | 2  | 112896.8 | 5.33  | PM, GA, ER     |
|                                                      |          | 3 | 3 | 29.96 | 3  | 112896.8 | 5.33  |                |
| Histone H2B type 1-M                                 | Q99879.3 | 1 | 1 | 21.25 | 11 | 13989.3  | 10.31 | N              |
|                                                      |          | 2 | 1 | 22.00 | 11 | 13989.3  | 10.31 |                |

\* Cyt. cytoplasm; PM, plasma membrane; N, nucleus; End, endosome; LM, lysosomal membrane; EVE, extravesicular exosome; Cav, ER, endoplasmic reticulum; CJ, cell junction; GA, Golgi apparatus

TABLE S4: Proteins identified by LC-MS/MS that unspecifically bound to azide-agarose during the pull-down assay

| Protein name  | UniProt accession number | Spectra | Distinct peptides | Distinct summed MS/MS search score | % AA coverage | Molecular mass (Da) | pI   |
|---------------|--------------------------|---------|-------------------|------------------------------------|---------------|---------------------|------|
| Serum albumin | P02768.2                 | 11      | 2                 | 33.66                              | 3             | 69367.1             | 5.92 |
|               |                          | 16      | 4                 | 61.83                              | 4             | 69367.1             | 5.92 |

Pull-down 1  
Pull-down 3
